# Supplementary material for: PO functional group-containing cryptands: from supramolecular complexes to poly[2]pseudorotaxanes
Source: Royal Society of Chemistry journal article supplement (doi:10.1039/c4cc09487e), 2014-12-22
Supplement: c4cc09487e1.pdf [file c4cc09487e1.pdf]

## Electronic Supplementary Information

### **P=O functional group-containing cryptands: from supramolecular complexes to poly[2]pseudorotaxanes**

Qi Wang,<sup>a</sup> Ming Cheng,<sup>a</sup> Shuhan Xiong,<sup>a</sup> Xiao-Yu Hu,<sup>a</sup> Juli Jiang,<sup>\*a</sup> Leyong Wang<sup>\*a</sup> and Yi  
Pan<sup>b</sup>

<sup>a</sup> Key Laboratory of Mesoscopic Chemistry of MOE, School of Chemistry and  
Chemical Engineering, Nanjing University, Nanjing 210093, China.

Fax: +86 25-83597090; Tel: +86 25-83592529;

E-mail: [jjl@nju.edu.cn](mailto:jjl@nju.edu.cn) (JJ); [lywang@nju.edu.cn](mailto:lywang@nju.edu.cn) (LW).

<sup>b</sup> State Key Laboratory of Coordination Chemistry, School of Chemistry and  
Chemical Engineering, Nanjing University, Nanjing 210093, China.

### Table of Contents

|                                                                                                                          |     |
|--------------------------------------------------------------------------------------------------------------------------|-----|
| 1. Materials and methods.....                                                                                            | S2  |
| 2. Synthesis of cryptands <b>1</b> and <b>2</b> .....                                                                    | S3  |
| 3. Studies of charge transfer interactions by UV-vis spectra .....                                                       | S20 |
| 4. Job plots for the complexes of <b>1</b> ⊃ <b>3</b> and <b>2</b> ⊃ <b>3</b> .....                                      | S20 |
| 5. LR-ESI-MS spectra of the complexes of <b>1</b> ⊃ <b>3</b> and <b>2</b> ⊃ <b>3</b> .....                               | S21 |
| 6. Determination of the association constants of <b>1</b> ⊃ <b>3</b> and <b>2</b> ⊃ <b>3</b> by <sup>1</sup> H NMR ..... | S22 |
| 7. Partial 2D COSY NMR spectra of <b>1</b> and <b>1</b> ⊃ <b>3</b> .....                                                 | S24 |
| 8. Partial 2D NOESY NMR spectra of <b>1</b> ⊃ <b>3</b> and <b>2</b> ⊃ <b>3</b> .....                                     | S25 |
| 9. X-ray crystal data of <b>1</b> ⊃ <b>3</b> and <b>2</b> ⊃ <b>3</b> .....                                               | S26 |
| 10. Crystal structure of <b>1</b> ⊃ <b>3</b> and <b>2</b> ⊃ <b>3</b> .....                                               | S28 |

## *1. Materials and methods*

All reactions were performed in atmosphere unless noted. The commercially available reagents and solvents were either employed as purchased or dried according to procedures described in the literature. Compounds 3,<sup>S1</sup> and 4<sup>S2</sup> were prepared according to literature procedure. NMR spectra were recorded on a Bruker DPX 300 MHz, 400 MHz or 500 MHz spectrometer with internal standard tetramethylsilane (TMS) and solvent signals as internal references, and the chemical shifts ( $\delta$ ) were expressed in ppm and  $J$  values were given in Hz. In the NMR spectra, the proton/carbon was not decoupled from phosphorus. 2D COSY and 2D NOESY experiments were performed on a Bruker DPX 400 MHz spectrometer. Low-resolution electrospray ionization mass spectra (LR-ESI-MS) were obtained on Finnigan MatTSQ 7000 instruments. High-resolution electrospray ionization mass spectra (HR-ESI-MS) were recorded on an Agilent 6540Q-TOF LCMS equipped with an electrospray ionization (ESI) probe operating in positive-ion mode with direct infusion.

## 2. Synthesis of cryptands **1** and **2**

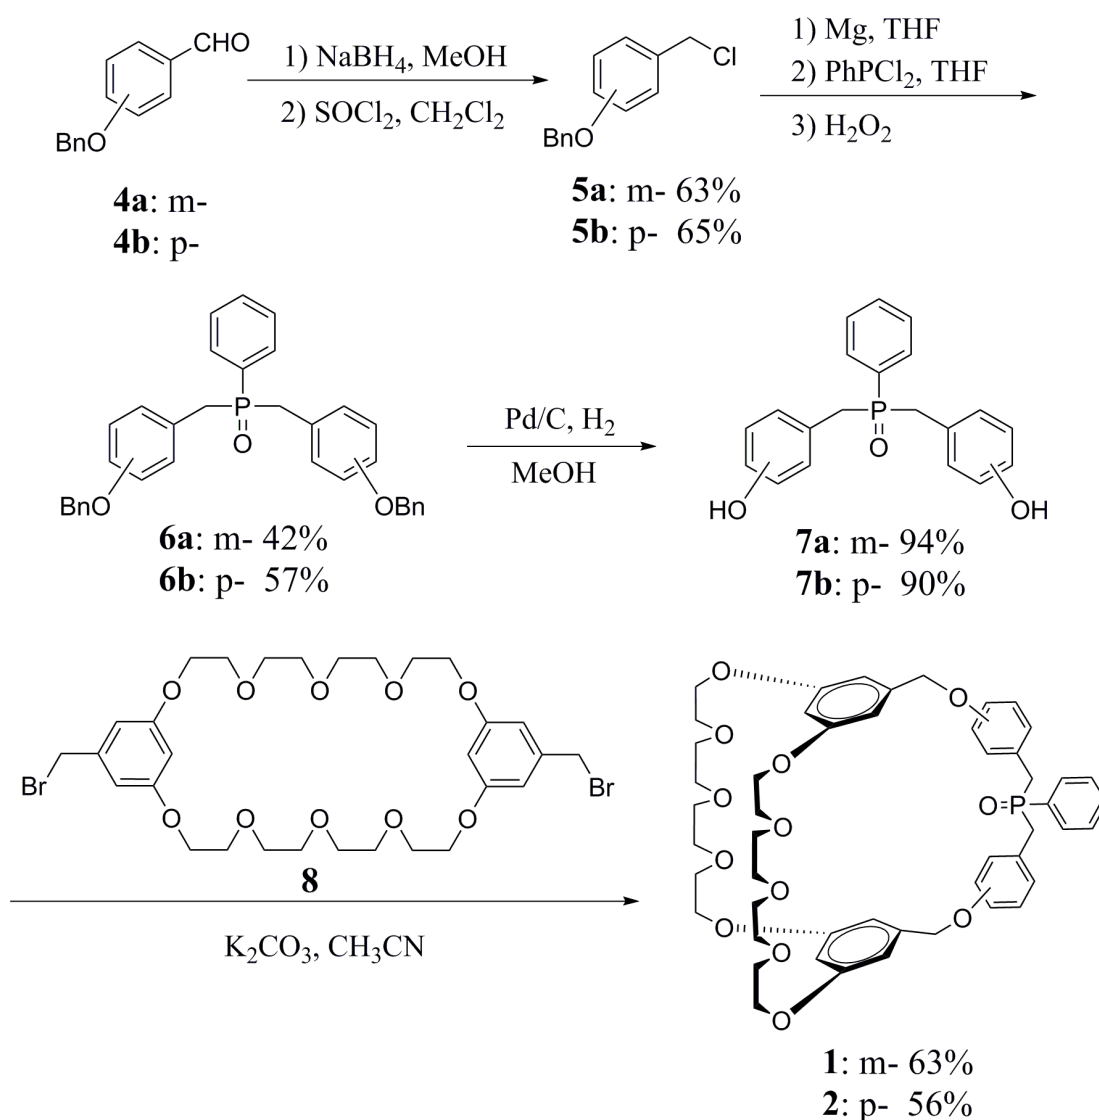

**Scheme S1** Synthesis of cryptands **1** and **2**.

**General procedure for the synthesis of **5**:** compound **4** (8.48 g, 39.95 mmol) was dissolved in methanol (120 mL), and then NaBH<sub>4</sub> (1.59 g, 42.03 mmol) was added. After 1 h, the solvent was removed by rotary evaporation. Then ethyl acetate (100 mL) and water (100 mL) were added. The organic layer was separated, and the aqueous phase was extracted with ethyl acetate (2 × 50 mL). The combined organic phases were then washed with water (50 mL) and brine (50 mL), and dried over anhydrous Na<sub>2</sub>SO<sub>4</sub>. The solvent was removed by rotary evaporation to give a white solid. The

solid was dissolved in dry CH<sub>2</sub>Cl<sub>2</sub> (50 mL), and then SOCl<sub>2</sub> (4.88 g, 41.02 mmol) was slowly added. After 20 h, the solvent was removed by rotary evaporation. The crude product was purified by column chromatography (silica, *n*-hexane/CH<sub>2</sub>Cl<sub>2</sub> = 4/1, *v/v*).

**5a**<sup>S3</sup>: white solid. 5.86 g, 25.18 mmol, 63%.

**5b**<sup>S3</sup>: white solid. 6.04 g, 25.96 mmol, 65%.

**General procedure for the synthesis of 6:** A Schlenk flask was charged with magnesium powder (0.25 g, 10.28 mmol), anhydrous THF (20 mL), and 1,2-dibromoethane (0.10 mL, 1.15 mmol). Then compound **5** (2.05 g, 8.81 mmol) in anhydrous THF (5 mL) was added dropwise with stirring. After 3 h, a solution of PhPCl<sub>2</sub> (0.72 g, 4.02 mmol) in anhydrous THF (5 mL) was added. After 20 h, saturated aqueous NH<sub>4</sub>Cl (4 mL) was added. The mixture was filtered and the filtrate was removed by rotary evaporation. Subsequently, CH<sub>2</sub>Cl<sub>2</sub> (50 mL) and H<sub>2</sub>O<sub>2</sub> (1 mL) was added and stirred for about half an hour. The mixture was dried over anhydrous Na<sub>2</sub>SO<sub>4</sub>. The solvent was removed by rotary evaporation. The crude product was purified by column chromatography (silica, CH<sub>2</sub>Cl<sub>2</sub>/AcOEt = 10/1, *v/v*).

**6a**: white solid, 0.88 g, 1.70 mmol, 42%. M.p. 142–143 °C. <sup>1</sup>H NMR (300 MHz, CDCl<sub>3</sub>, 298 K)  $\delta$  (ppm): 7.56–7.28 (m, 15H), 7.14 (t, *J* = 7.9 Hz, 2H), 6.82 (d, *J* = 8.2 Hz, 2H), 6.74–6.71 (m, 4H), 4.94 (s, 4H), 3.31 (d, *J* = 13.9 Hz, 4H). <sup>13</sup>C NMR (75 MHz, CDCl<sub>3</sub>, 298 K)  $\delta$  (ppm): 158.9, 137.0, 133.0 (d, *J* = 7.4 Hz), 131.9, 131.3 (d, *J* = 8.5 Hz), 129.7, 128.7, 128.4 (d, *J* = 11.4 Hz), 128.1, 127.6, 122.8 (d, *J* = 5.0 Hz), 116.3 (d, *J* = 4.8 Hz), 114.0, 69.9, 37.6 (d, *J* = 63.2 Hz). <sup>31</sup>P NMR (500 MHz, CDCl<sub>3</sub>, 298 K)  $\delta$  (ppm): 34.8 (s). LR-ESI-MS: *m/z* calcd. for [M + H]<sup>+</sup> = 519.21, found 519.15 (100%); [M + Na]<sup>+</sup> = 541.19, found 541.15 (80%). HR-ESI-MS: *m/z* calcd. for [M + H]<sup>+</sup> C<sub>34</sub>H<sub>32</sub>O<sub>3</sub>P<sup>+</sup>, 519.2089, found 519.2087, error –0.4 ppm.

**6b**: white solid, 1.19 g, 2.29 mmol, 57%. M.p. 188–190 °C. <sup>1</sup>H NMR (300 MHz, CDCl<sub>3</sub>, 298 K)  $\delta$  (ppm): 7.54–7.31 (m, 15H), 7.03 (dd, *J*<sub>1</sub> = 8.6 Hz, *J*<sub>2</sub> = 1.9 Hz, 4H), 6.84 (d, *J* = 8.6 Hz, 4H), 5.01 (s, 4H), 3.27 (d, *J* = 13.5 Hz, 4H). <sup>13</sup>C NMR (75 MHz, CDCl<sub>3</sub>, 298 K)  $\delta$  (ppm): 157.9, 137.1, 131.8, 131.3 (d, *J* = 8.8 Hz), 131.1 (d, *J* = 5.0 Hz), 128.7, 128.4 (d, *J* = 11.3 Hz), 128.1, 127.6, 123.7 (d, *J* = 7.5 Hz), 115.1, 70.1,

36.5 (d,  $J = 64.0$  Hz).  $^{31}\text{P}$  NMR (500 MHz,  $\text{CDCl}_3$ , 298 K)  $\delta$  (ppm): 35.2 (s). LR-ESI-MS:  $m/z$  calcd. for  $[\text{M} + \text{H}]^+ = 519.21$ , found: 519.15 (100%);  $[\text{M} + \text{Na}]^+ = 541.19$ , found 541.15 (33%). HR-ESI-MS:  $m/z$  calcd for  $[\text{M} + \text{H}]^+ \text{C}_{34}\text{H}_{32}\text{O}_3\text{P}^+$ , 519.2089, found 519.2088, error  $-0.2$  ppm.

**General procedure for the synthesis of 7:** A Schlenk flask was charged with **6** (1.60 g, 3.09 mmol) and 10% Pd/C (0.30 g) in MeOH (30 mL), and the above mixture was stirred at 25 °C under  $\text{H}_2$  for 24 h. The mixture was filtered and the filtrate was removed by rotary evaporation to give **7** as a white solid.

**7a:** 0.99 g, 2.93 mmol, 94%. M.p. 107–108 °C.  $^1\text{H}$  NMR (300 MHz,  $\text{DMSO}-d_6$ , 298 K)  $\delta$  (ppm): 9.24 (s, 2H), 7.70–7.64 (m, 2H), 7.51–7.37 (m, 3H), 6.94 (t,  $J = 7.7$  Hz, 2H), 6.54–6.51 (m, 4H), 6.46 (d,  $J = 7.4$  Hz, 2H), 3.37–3.30 (m, 4H).  $^{13}\text{C}$  NMR (75 MHz,  $\text{DMSO}-d_6$ , 298 K)  $\delta$  (ppm): 157.0, 133.7 (d,  $J = 7.9$  Hz), 132.6, 131.3, 131.1 (d,  $J = 8.9$  Hz), 128.9, 128.1 (d,  $J = 11.1$  Hz), 120.6 (d,  $J = 4.8$  Hz), 116.9 (d,  $J = 4.6$  Hz), 113.3, 36.8 (d,  $J = 62.7$  Hz).  $^{31}\text{P}$  NMR (500 MHz,  $\text{DMSO}-d_6$ , 298 K)  $\delta$  (ppm): 35.1 (s). LR-ESI-MS:  $m/z$  calcd. for  $[\text{M} + \text{H}]^+ = 339.12$ , found: 339.05 (100%);  $[\text{M} + \text{Na}]^+ = 361.10$ , found 361.05 (31%). HR-ESI-MS:  $m/z$  calcd. for  $[\text{M} + \text{H}]^+ \text{C}_{20}\text{H}_{20}\text{O}_3\text{P}^+$ , 339.1150, found 339.1161, error 3.2 ppm.

**7b:** 0.95 g, 2.81 mmol, 90%. M.p. 214–216 °C.  $^1\text{H}$  NMR (300 MHz,  $\text{DMSO}-d_6$ , 298 K)  $\delta$  (ppm): 9.17 (s, 2H), 7.64–7.58 (m, 2H), 7.48–7.39 (m, 3H), 6.85 (dd,  $J_1 = 8.5$  Hz,  $J_2 = 2.0$  Hz, 4H), 6.55 (d,  $J = 8.4$  Hz, 4H), 3.30–3.18 (m, 4H).  $^{13}\text{C}$  NMR (75 MHz,  $\text{DMSO}-d_6$ , 298 K)  $\delta$  (ppm): 155.8, 132.8, 131.6, 131.2, 131.1 (d,  $J = 8.7$  Hz), 130.7 (d,  $J = 4.8$  Hz), 128.1 (d,  $J = 10.9$  Hz), 122.3 (d,  $J = 8.2$  Hz), 115.0, 35.6 (d,  $J = 63.6$  Hz).  $^{31}\text{P}$  NMR (500 MHz,  $\text{DMSO}-d_6$ , 298 K)  $\delta$  (ppm): 34.5 (s). LR-ESI-MS:  $m/z$  calcd. for  $[\text{M} + \text{H}]^+ = 339.12$ , found 339.05 (100%);  $[\text{M} + \text{Na}]^+ = 361.10$ , found 361.05 (20%). HR-ESI-MS:  $m/z$  calcd. for  $[\text{M} + \text{H}]^+ \text{C}_{20}\text{H}_{20}\text{O}_3\text{P}^+$ , 339.1150, found 339.1151, error 0.3 ppm.

**General procedure for the synthesis of 1 and 2:** A mixture of **7** (0.10 g, 0.30 mmol) and **8** (0.22 g, 0.30 mmol) in anhydrous  $\text{CH}_3\text{CN}$  (60 mL) was added very slowly to a

suspension containing K<sub>2</sub>CO<sub>3</sub> (0.25 g, 1.81 mmol) in anhydrous CH<sub>3</sub>CN (150 mL) at reflux temperature under nitrogen gas protection. After complete addition, the mixture was stirred at reflux temperature for 2 days. After the solvent was removed by rotary evaporation, the residue was purified by column chromatography (silica, CH<sub>2</sub>Cl<sub>2</sub>/CH<sub>3</sub>OH = 100/1, v/v).

**1:** white solid, 0.17 g, 0.19 mmol, 63%, M.p. 48–50 °C. <sup>1</sup>H NMR (400 MHz, CDCl<sub>3</sub>, 298 K)  $\delta$  (ppm): 7.51–7.38 (m, 5H), 7.09 (t,  $J$  = 7.9 Hz, 2H), 6.82 (d,  $J$  = 8.2 Hz, 2H), 6.65 (d,  $J$  = 7.5 Hz, 2H), 6.59 (s, 2H), 6.47 (d,  $J$  = 1.8 Hz, 4H), 6.30 (t,  $J$  = 1.9 Hz, 2H), 4.92–4.85 (m, 4H), 3.92–3.89 (m, 8H), 3.78–3.76 (m, 8H), 3.68–3.65 (m, 16H), 3.30–3.14 (m, 4H). <sup>13</sup>C NMR (100 MHz, CDCl<sub>3</sub>, 298 K)  $\delta$  (ppm): 160.2, 158.5 (d,  $J$  = 2.2 Hz), 139.1, 132.6 (d,  $J$  = 7.3 Hz), 132.2, 131.1 (d,  $J$  = 8.6 Hz), 129.7, 128.5 (d,  $J$  = 11.5 Hz), 122.9 (d,  $J$  = 5.2 Hz), 116.0 (d,  $J$  = 5.7 Hz), 114.5, 106.0, 100.9, 71.0, 70.8, 69.8, 69.7, 67.6, 37.0 (d,  $J$  = 62.9 Hz). <sup>31</sup>P NMR (400 MHz, CDCl<sub>3</sub>, 298 K)  $\delta$  (ppm): 48.4 (s). LR-ESI-MS:  $m/z$  calcd. for [M + H]<sup>+</sup> = 899.38, found 899.40 (100%); [M + NH<sub>4</sub>]<sup>+</sup> = 916.40, found 916.40 (75%); [M + Na]<sup>+</sup> = 921.36, found 921.35 (58%); [M + K]<sup>+</sup> = 937.33, found 937.30 (31%). HR-ESI-MS:  $m/z$  calcd. for [M + Na]<sup>+</sup> C<sub>50</sub>H<sub>59</sub>NaO<sub>13</sub>P<sup>+</sup>, 921.3591, found 921.3591, error 0.0 ppm.

**2:** white solid, 0.15 g, 0.17 mmol, 56%, M.p. 63–65 °C. <sup>1</sup>H NMR (400 MHz, CDCl<sub>3</sub>, 298 K)  $\delta$  (ppm): 7.61–7.41 (m, 5H), 6.90 (dd,  $J_1$  = 8.4 Hz,  $J_2$  = 1.5 Hz, 4H), 6.64 (d,  $J$  = 8.5 Hz, 4H), 6.44 (d,  $J$  = 2.0 Hz, 4H), 6.33 (t,  $J$  = 2.0 Hz, 4H), 4.95 (s, 4H), 3.98–3.95 (m, 8H), 3.80–3.78 (m, 8H), 3.67–3.66 (m, 16H), 3.31–3.11 (m, 4H). <sup>13</sup>C NMR (100 MHz, CDCl<sub>3</sub>, 298 K)  $\delta$  (ppm): 160.2, 157.3 (d,  $J$  = 2.7 Hz), 139.6, 132.1 (d,  $J$  = 2.1 Hz), 131.0 (d,  $J$  = 5.5 Hz), 130.9, 128.6 (d,  $J$  = 11.3 Hz), 123.3 (d,  $J$  = 7.4 Hz), 115.3 (d,  $J$  = 1.9 Hz), 105.5, 100.7, 70.92, 70.85, 69.8, 67.6, 36.3 (d,  $J$  = 64.2 Hz). <sup>31</sup>P NMR (400 MHz, CDCl<sub>3</sub>, 298 K)  $\delta$  (ppm): 35.9 (s). LR-ESI-MS:  $m/z$  calcd. for [M + H]<sup>+</sup> = 899.38, found 899.55 (20%); [M + NH<sub>4</sub>]<sup>+</sup> = 916.40, found 916.55 (40%); [M + K]<sup>+</sup> = 937.33, found 937.50 (100%). HR-ESI-MS:  $m/z$  calcd. for [M + Na]<sup>+</sup> C<sub>50</sub>H<sub>59</sub>NaO<sub>13</sub>P<sup>+</sup>, 921.3591, found 921.3587, error –0.4 ppm.

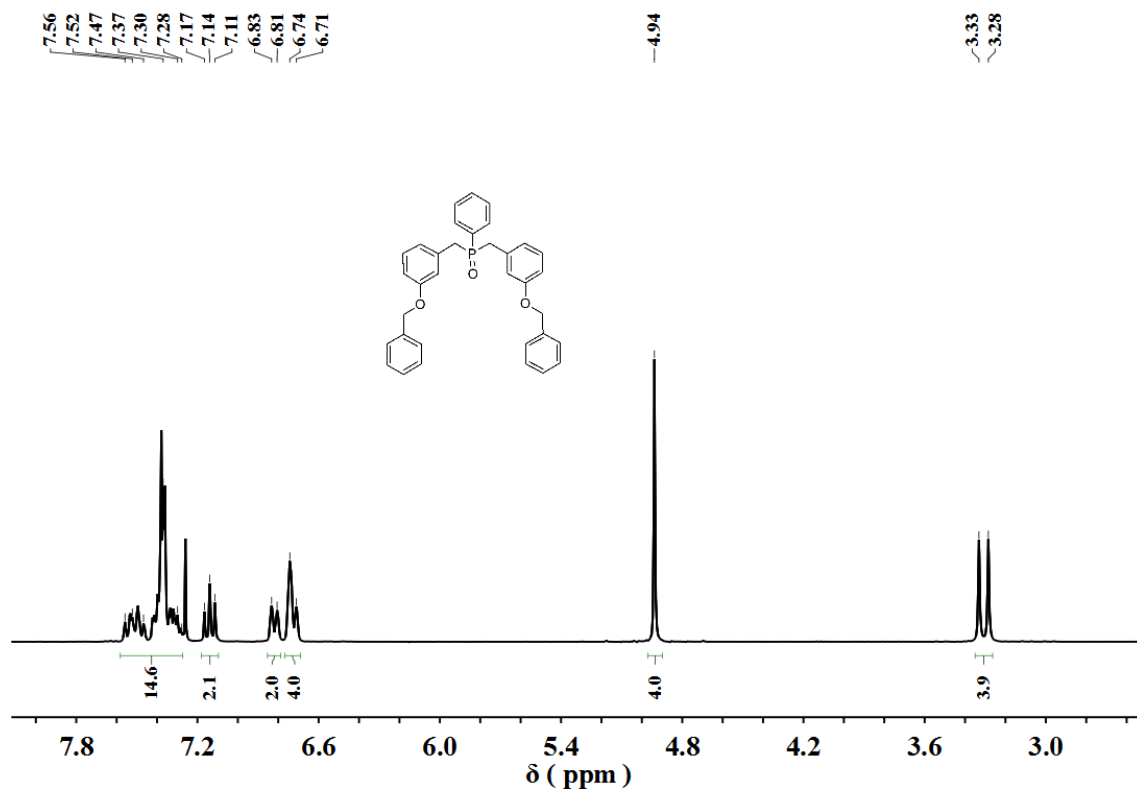

Fig. S1 <sup>1</sup>H NMR spectrum (300 MHz, CDCl<sub>3</sub>, 298 K) of 6a.

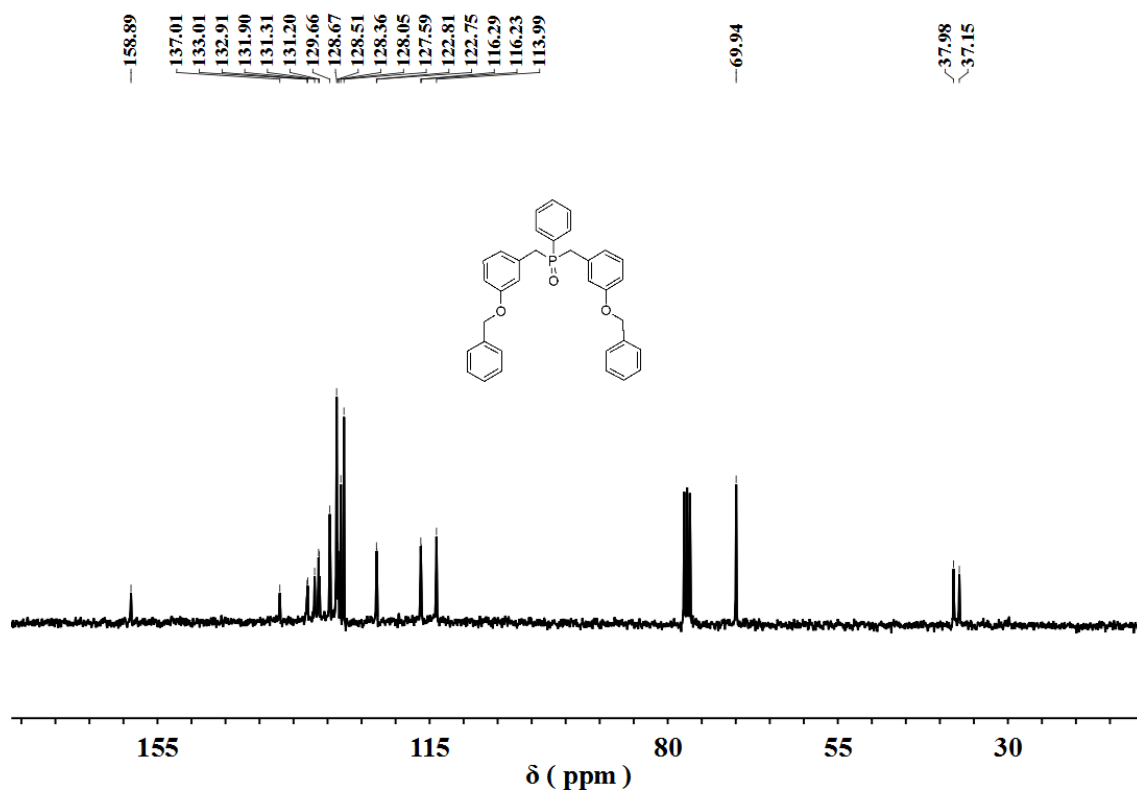

Fig. S2 <sup>13</sup>C NMR spectrum (75 MHz, CDCl<sub>3</sub>, 298 K) of 6a.

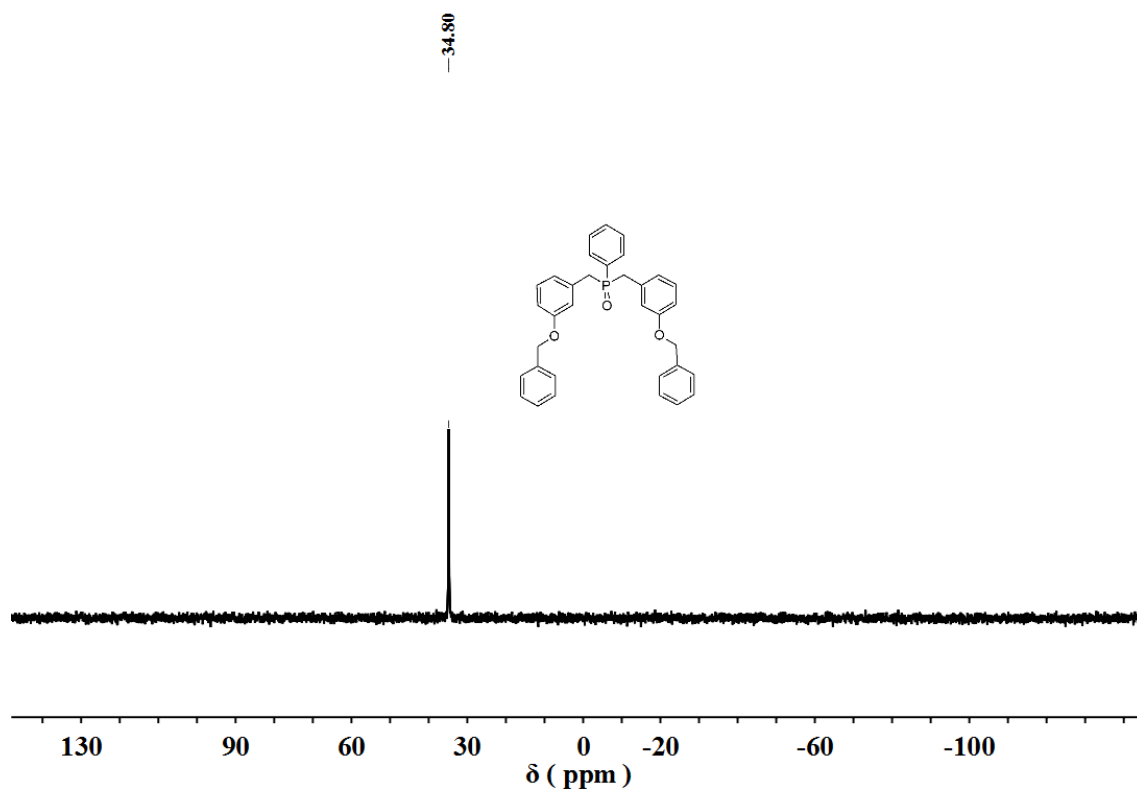

**Fig. S3**  $^{31}\text{P}$  NMR spectrum (500 MHz,  $\text{CDCl}_3$ , 298 K) of **6a**.

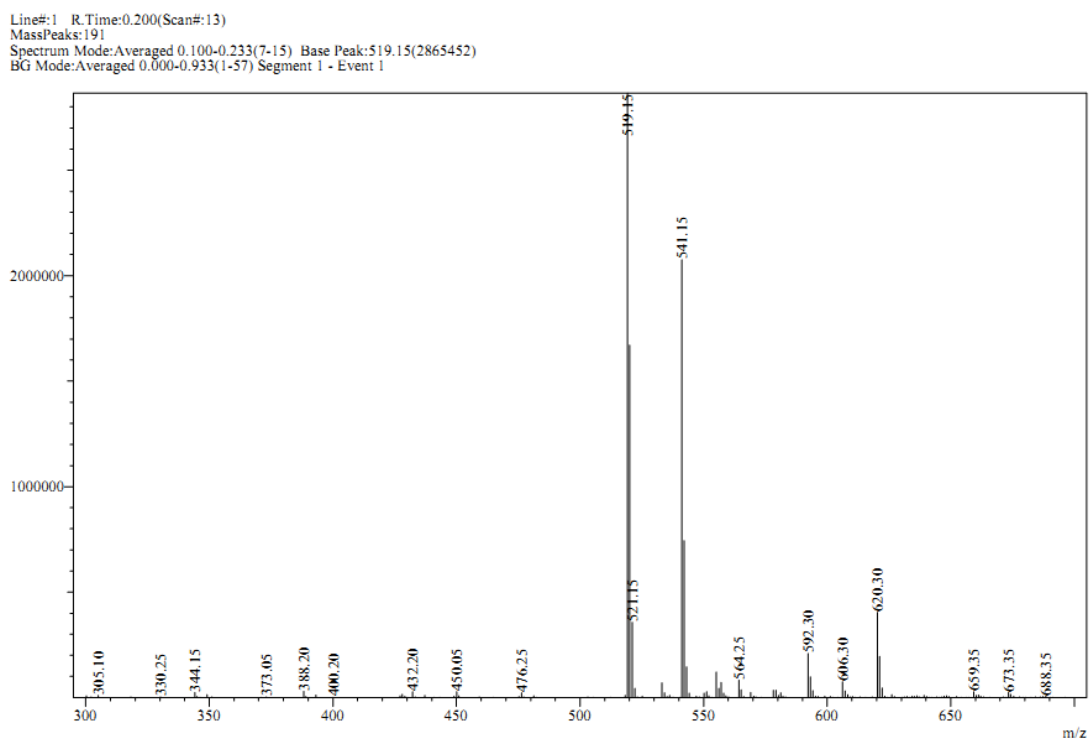

**Fig. S4** LR-ESI-MS spectrum of **6a**.



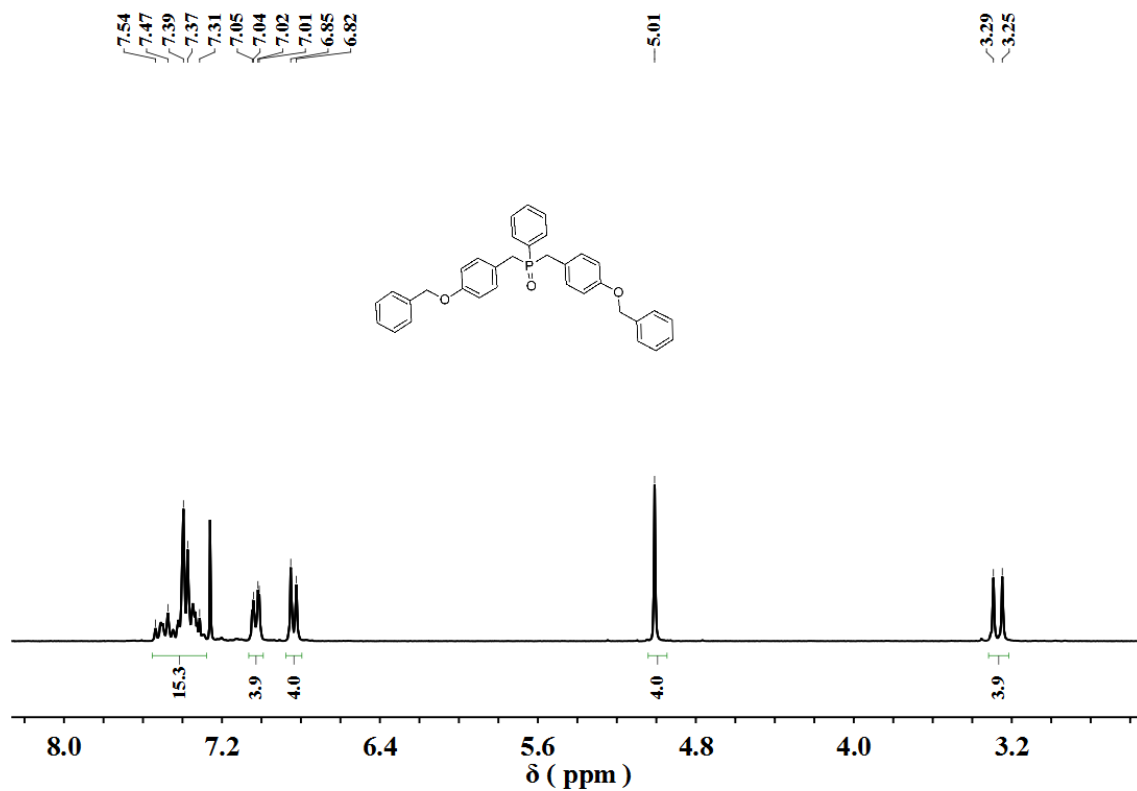

Fig. S5 <sup>1</sup>H NMR spectrum (300 MHz, CDCl<sub>3</sub>, 298 K) of **6b**.

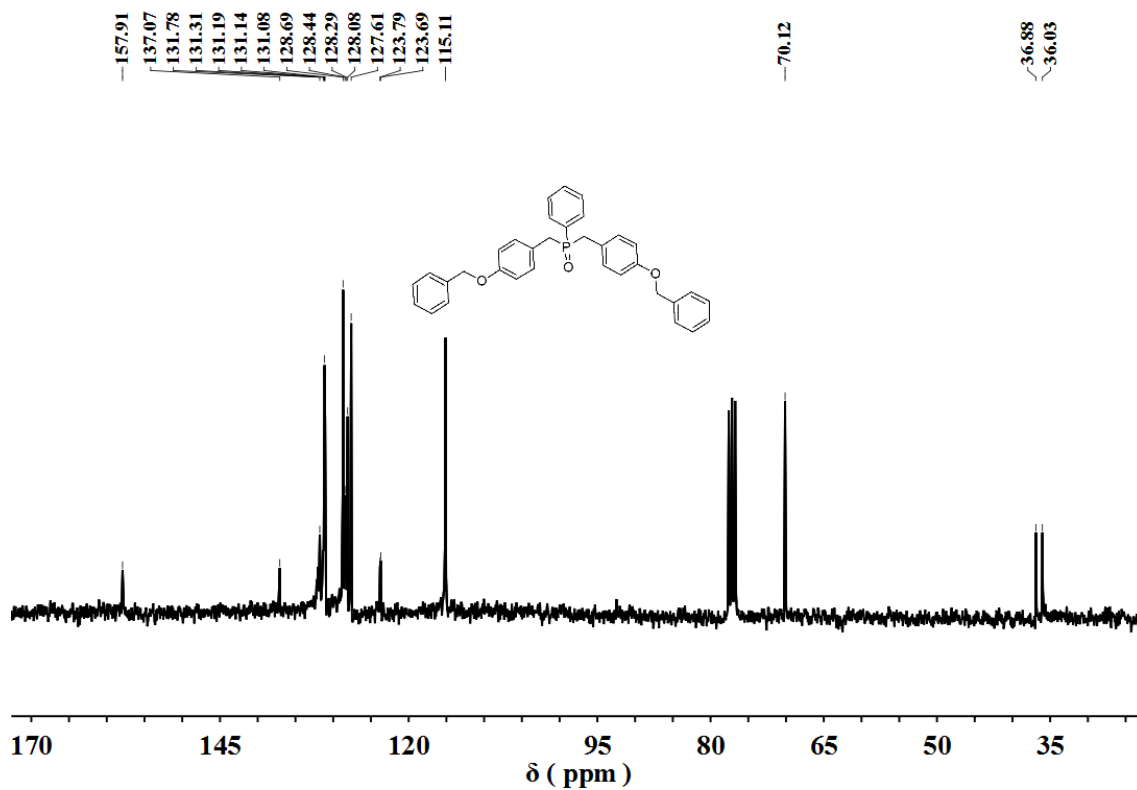

Fig. S6 <sup>13</sup>C NMR spectrum (75 MHz, CDCl<sub>3</sub>, 298 K) of **6b**.

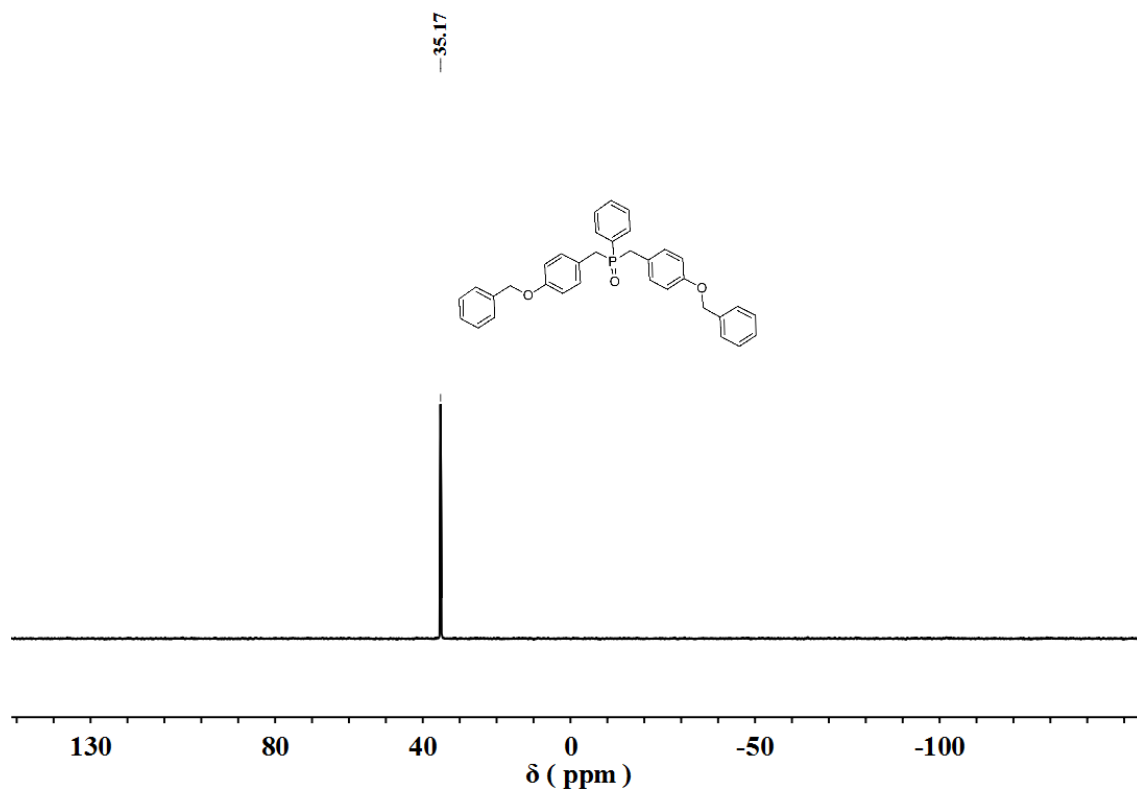

**Fig S7**  $^{31}\text{P}$  NMR spectrum (500 MHz,  $\text{CDCl}_3$ , 298 K) of **6b**.

Line#:1 R.Time:0.200(Scan#:13)  
 MassPeaks:326  
 Spectrum Mode:Averaged 0.133-0.233(9-15) Base Peak:519.15(3862615)  
 BG Mode:Averaged 0.000-0.933(1-57) Segment 1 - Event 1

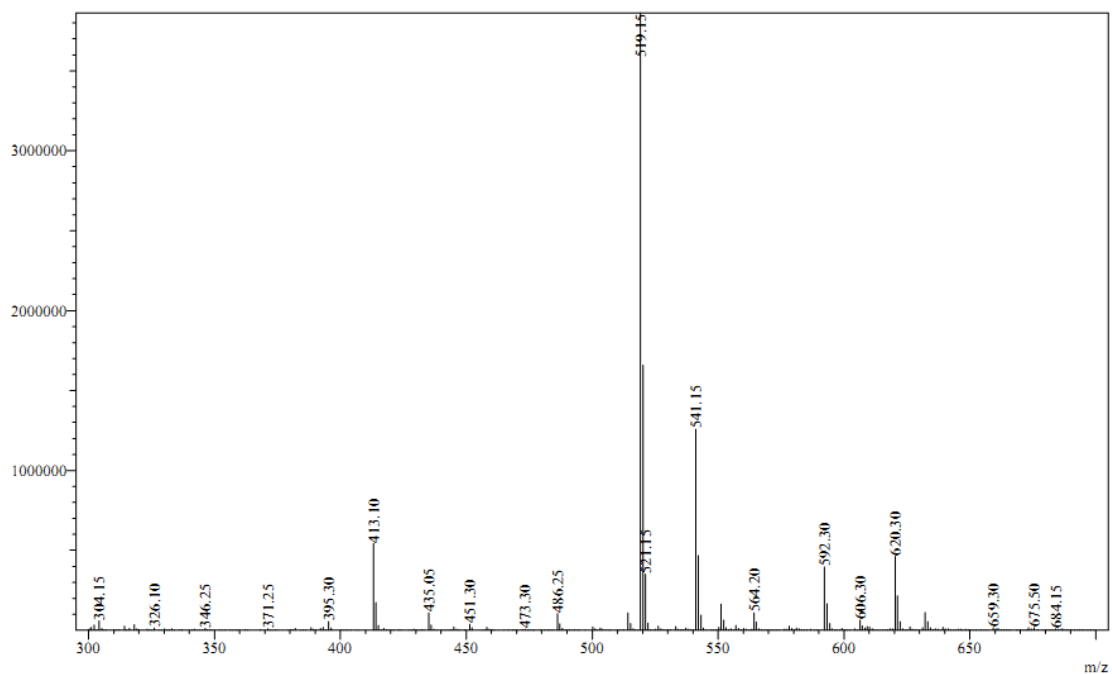

**Fig. S8** LR-ESI-MS spectrum of **6b**.

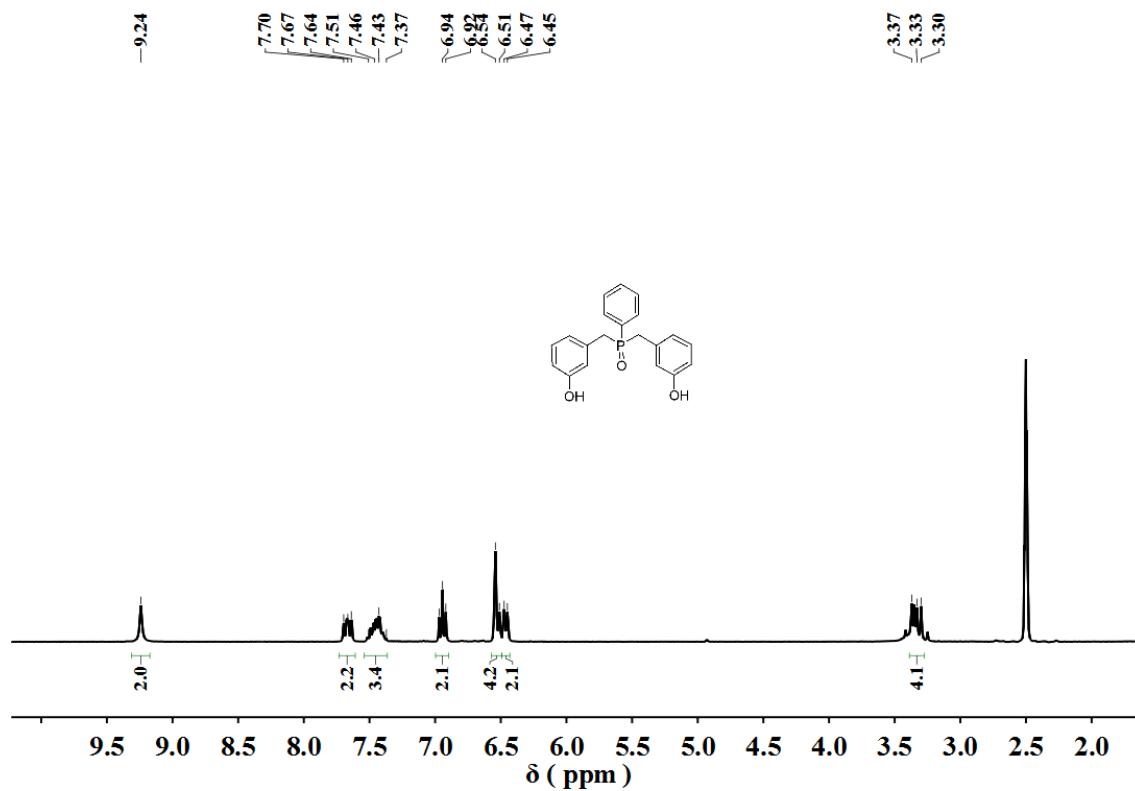

Fig. S9 <sup>1</sup>H NMR spectrum (300 MHz, DMSO-*d*<sub>6</sub>, 298 K) of 7a.

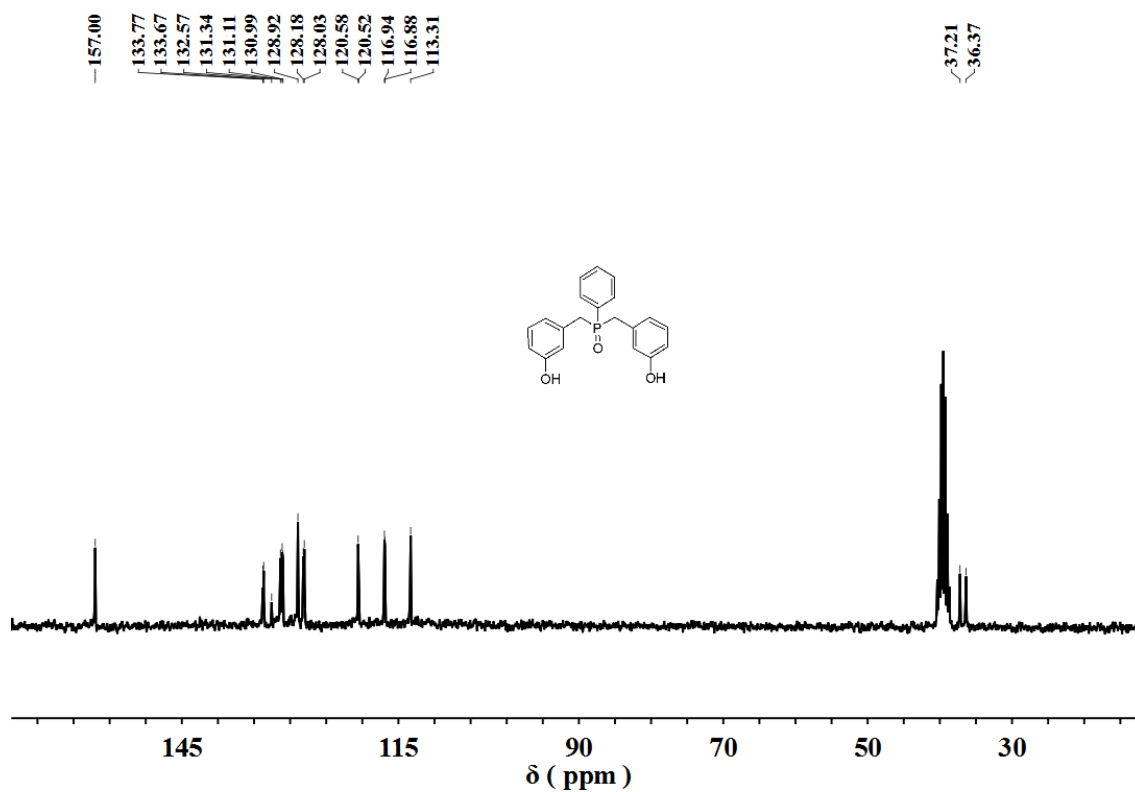

Fig. S10 <sup>13</sup>C NMR spectrum (75 MHz, DMSO-*d*<sub>6</sub>, 298 K) of 7a.

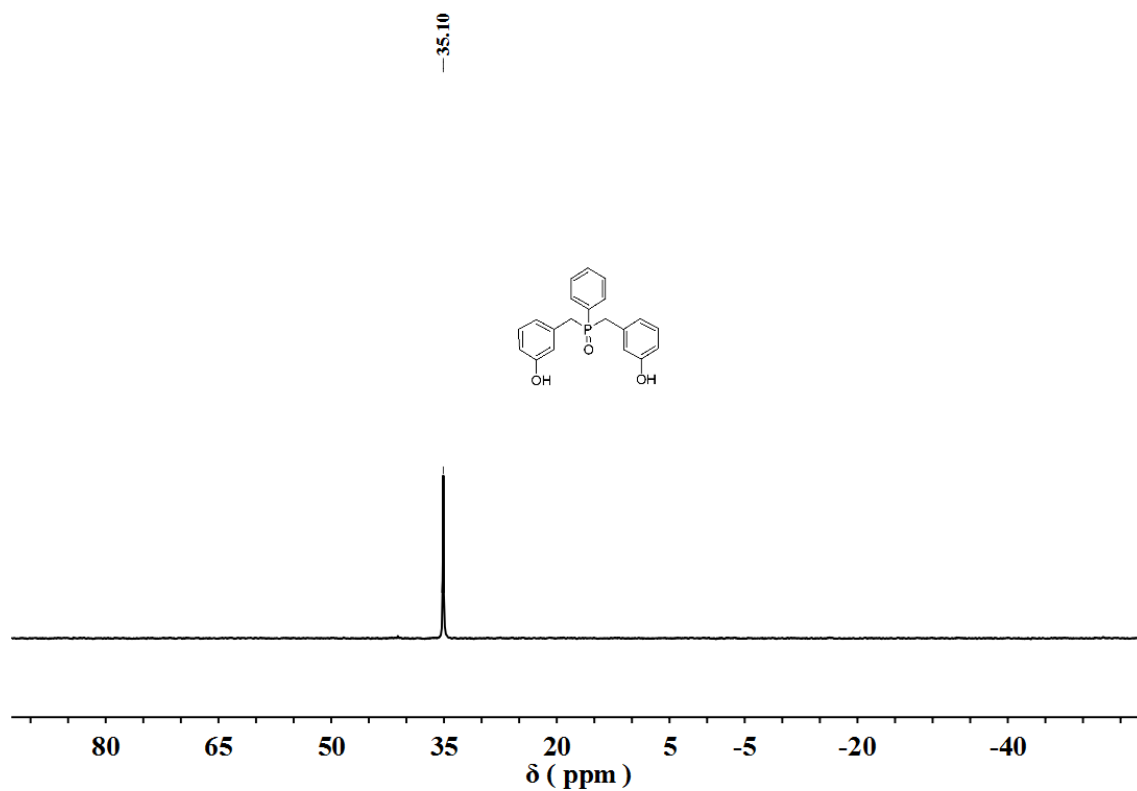

**Fig. S11**  $^{31}\text{P}$  NMR spectrum (500 MHz,  $\text{DMSO-}d_6$ , 298 K) of **7a**.

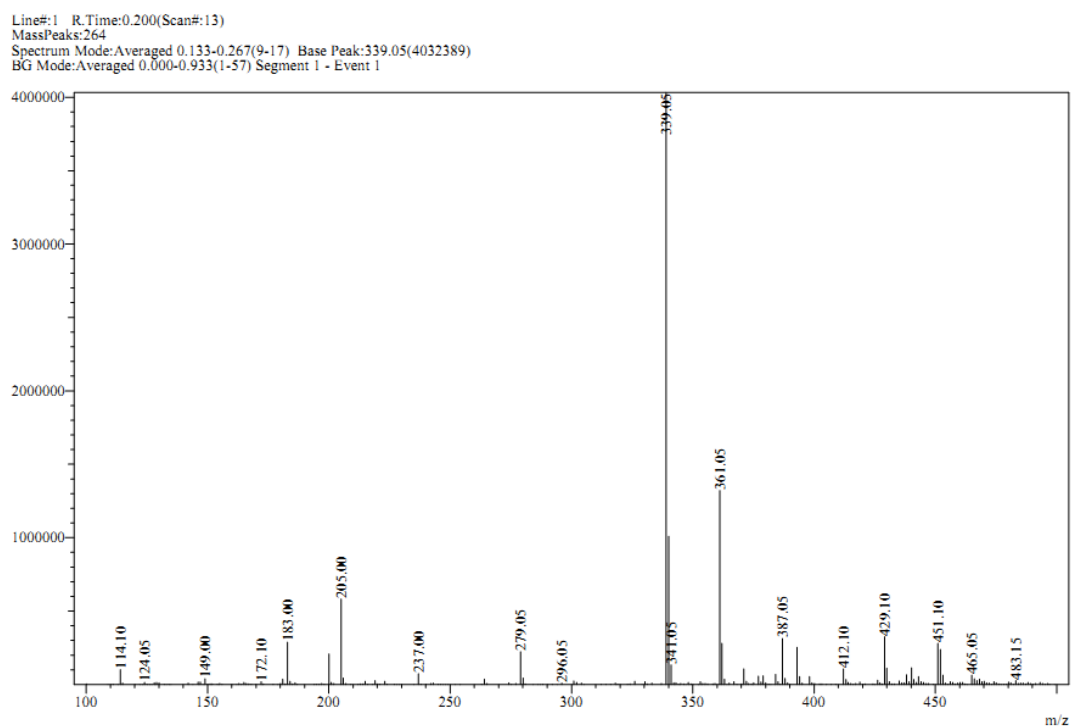

**Fig. S12** LR-ESI-MS spectrum of **7a**.

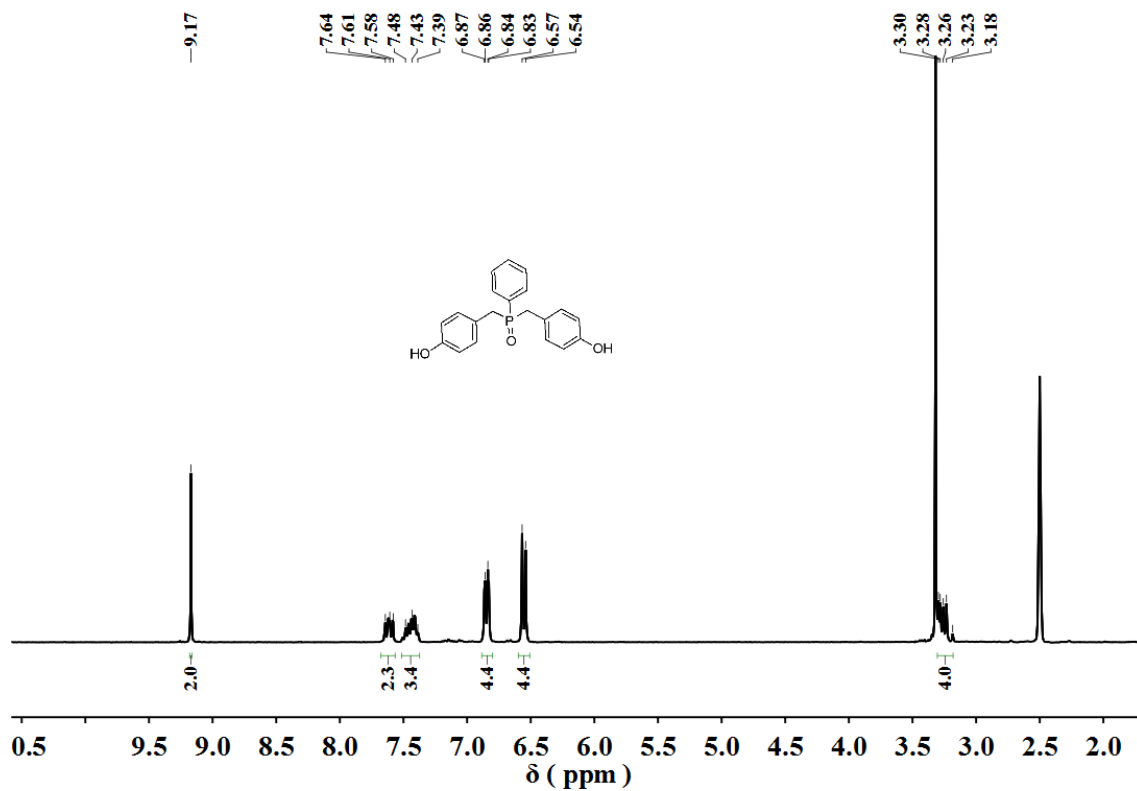

Fig. S13 <sup>1</sup>H NMR spectrum (300 MHz, DMSO-*d*<sub>6</sub>, 298 K) of 7b.

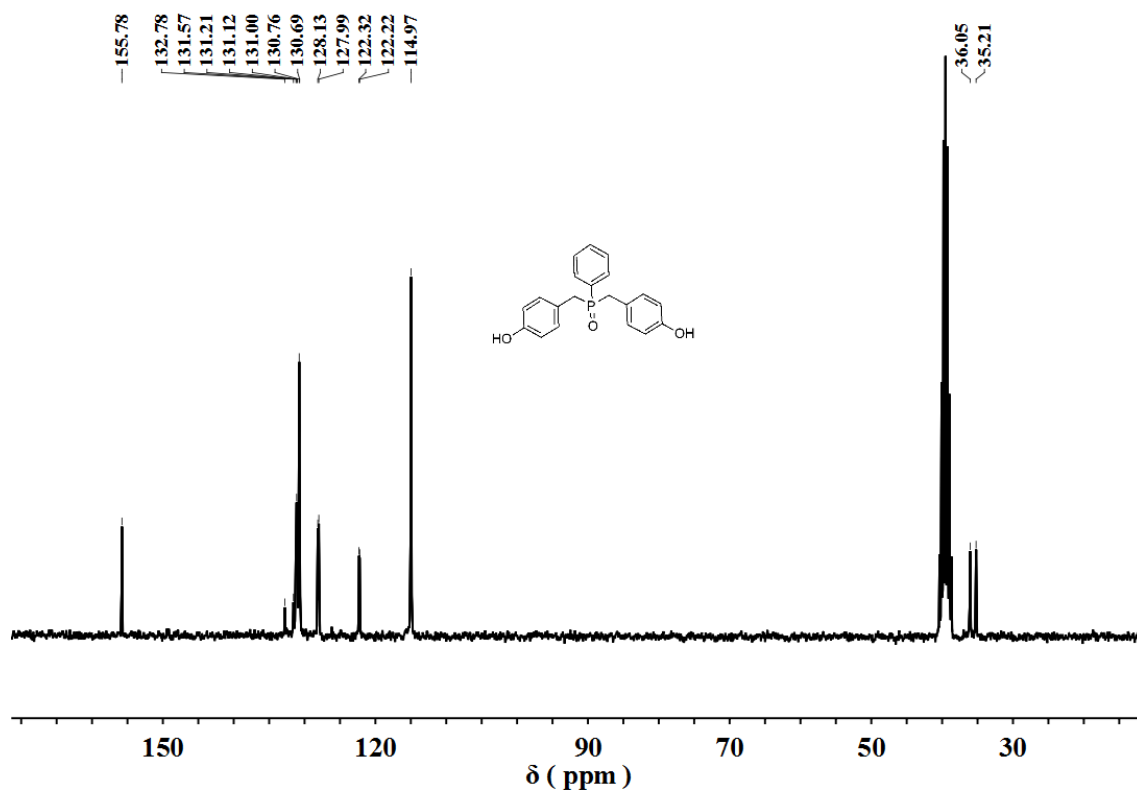

Fig. S14 <sup>13</sup>C NMR spectrum (75 MHz, DMSO-*d*<sub>6</sub>, 298 K) of 7b.

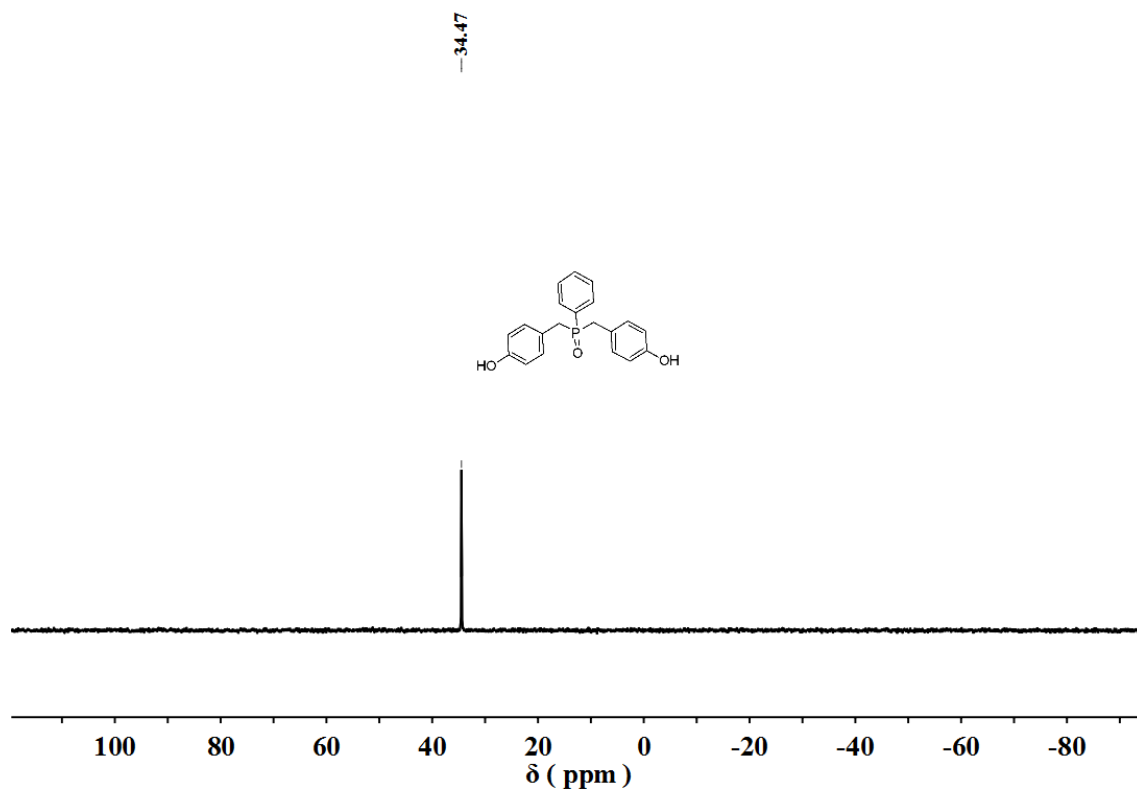

**Fig. S15**  $^{31}\text{P}$  NMR spectrum (500 MHz, DMSO- $d_6$ , 298 K) of 7b.

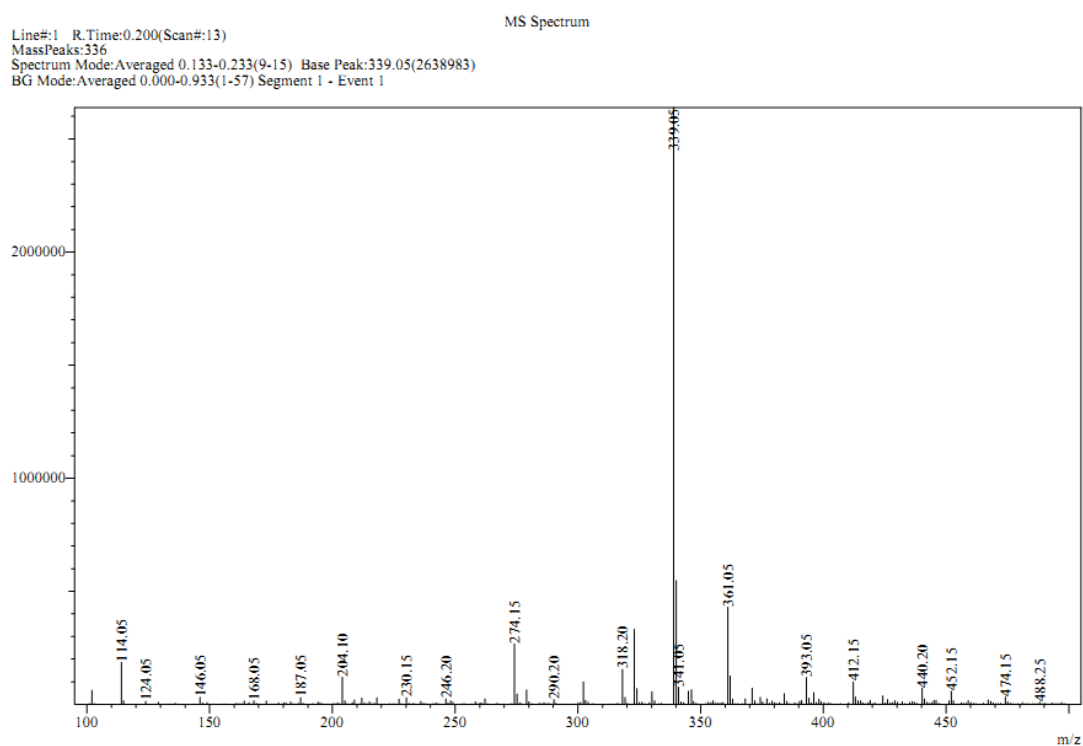

**Fig. S16** LR-ESI-MS spectrum of 7b.

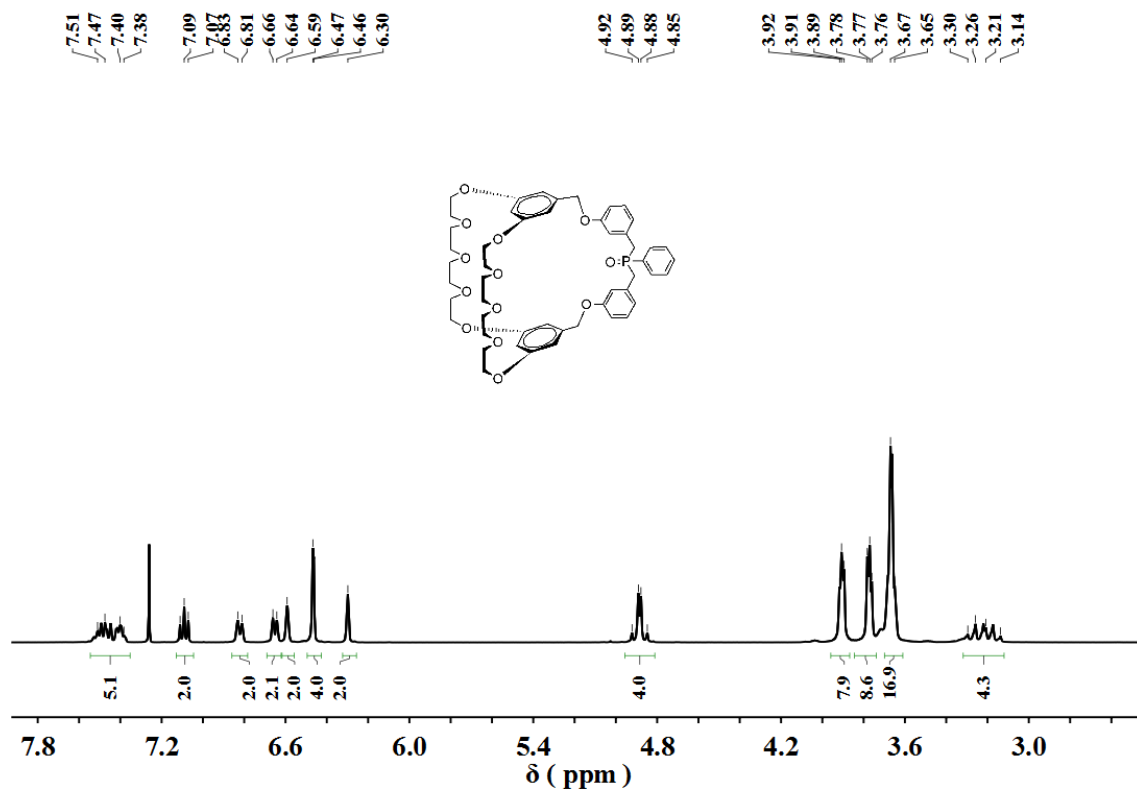

Fig. S17 <sup>1</sup>H NMR spectrum (400 MHz, CDCl<sub>3</sub>, 298 K) of 1.

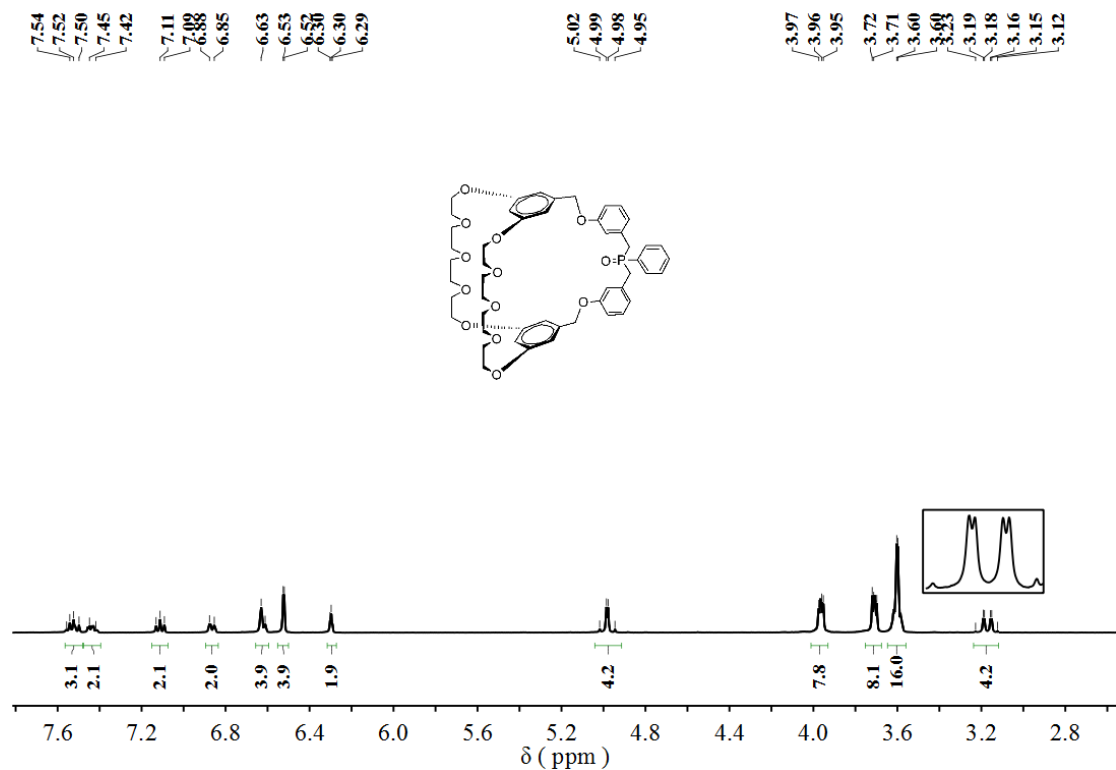

Fig. S18 <sup>1</sup>H NMR spectrum (400 MHz, CD<sub>3</sub>CN, 298 K) of 1.

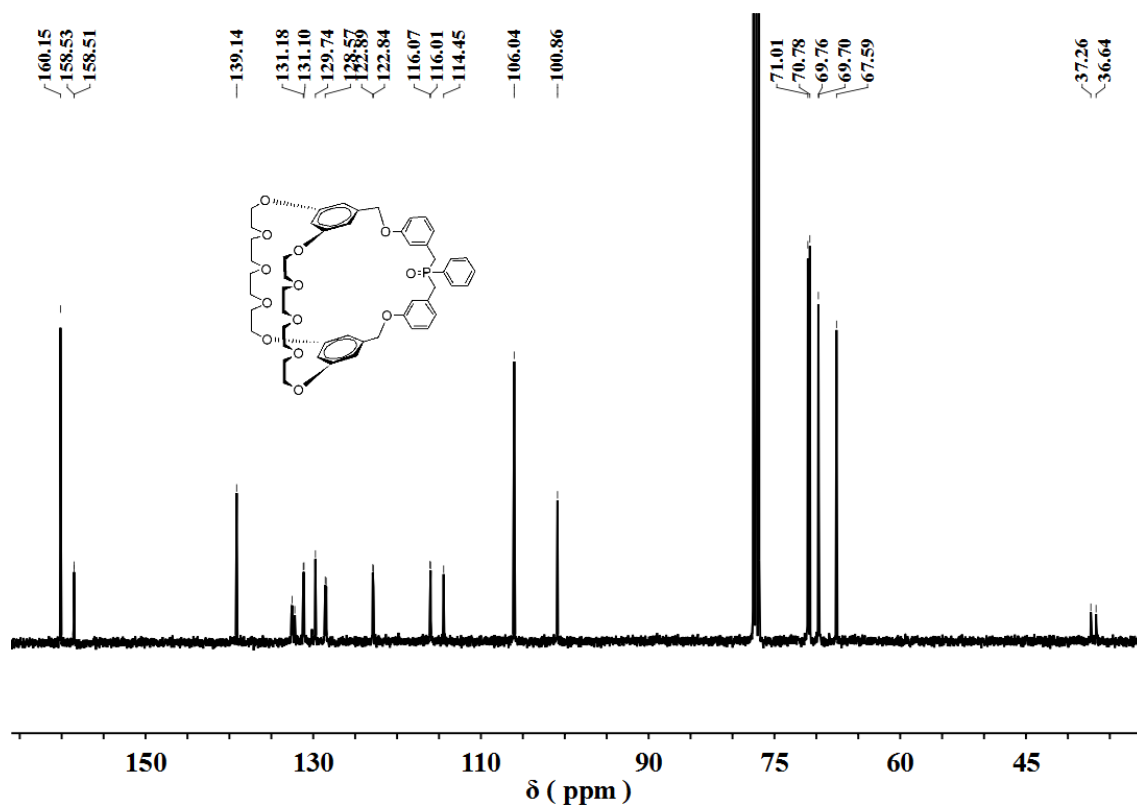

Fig. S19 <sup>13</sup>C NMR spectrum (100 MHz, CDCl<sub>3</sub>, 298 K) of 1.

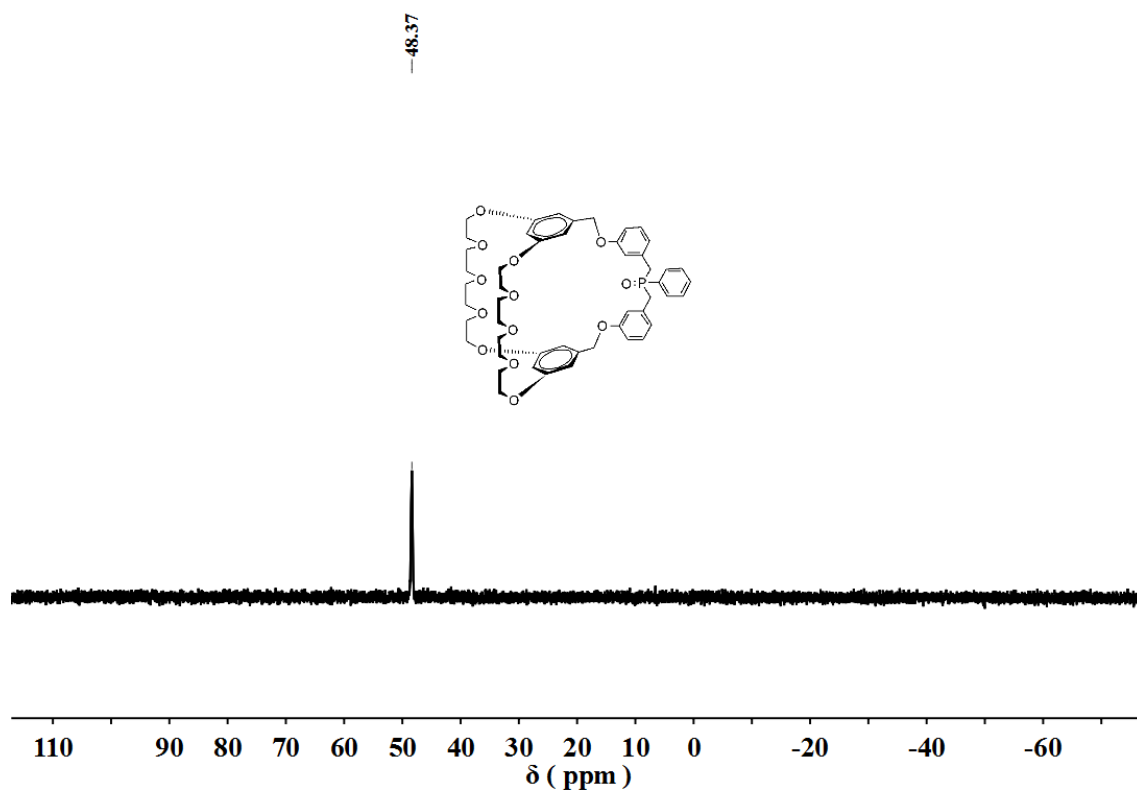

Fig. S20 <sup>31</sup>P NMR spectrum (400 MHz, CDCl<sub>3</sub>, 298 K) of 1.



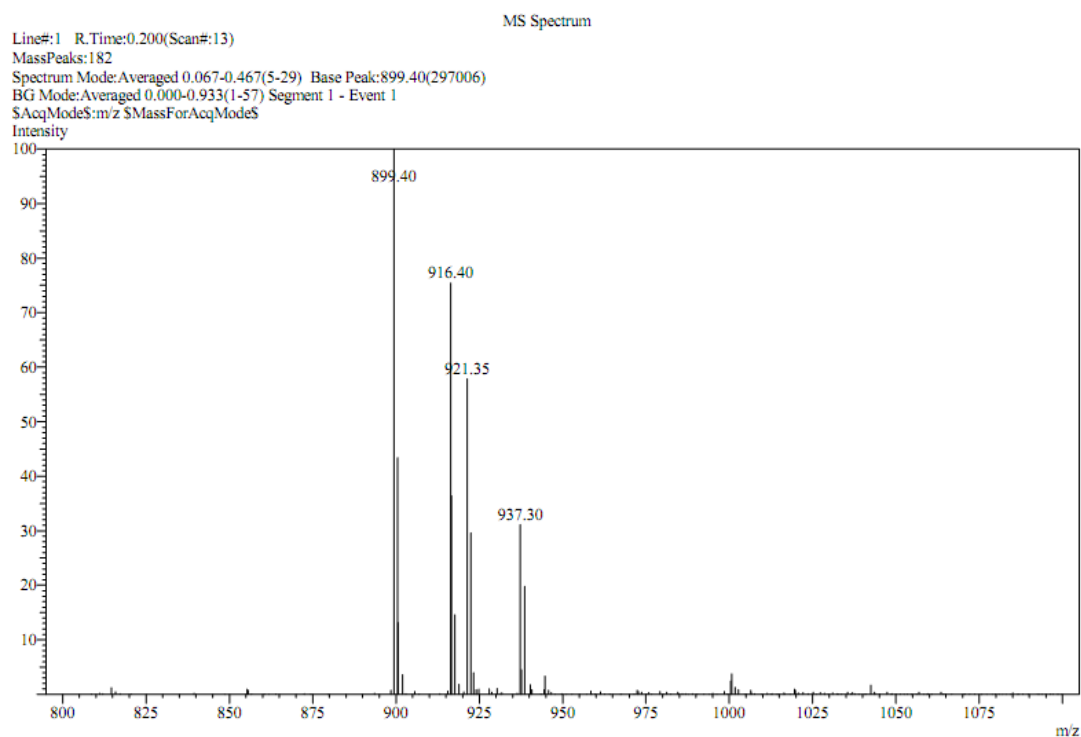

Fig. S21 LR-ESI-MS spectrum of **1**.

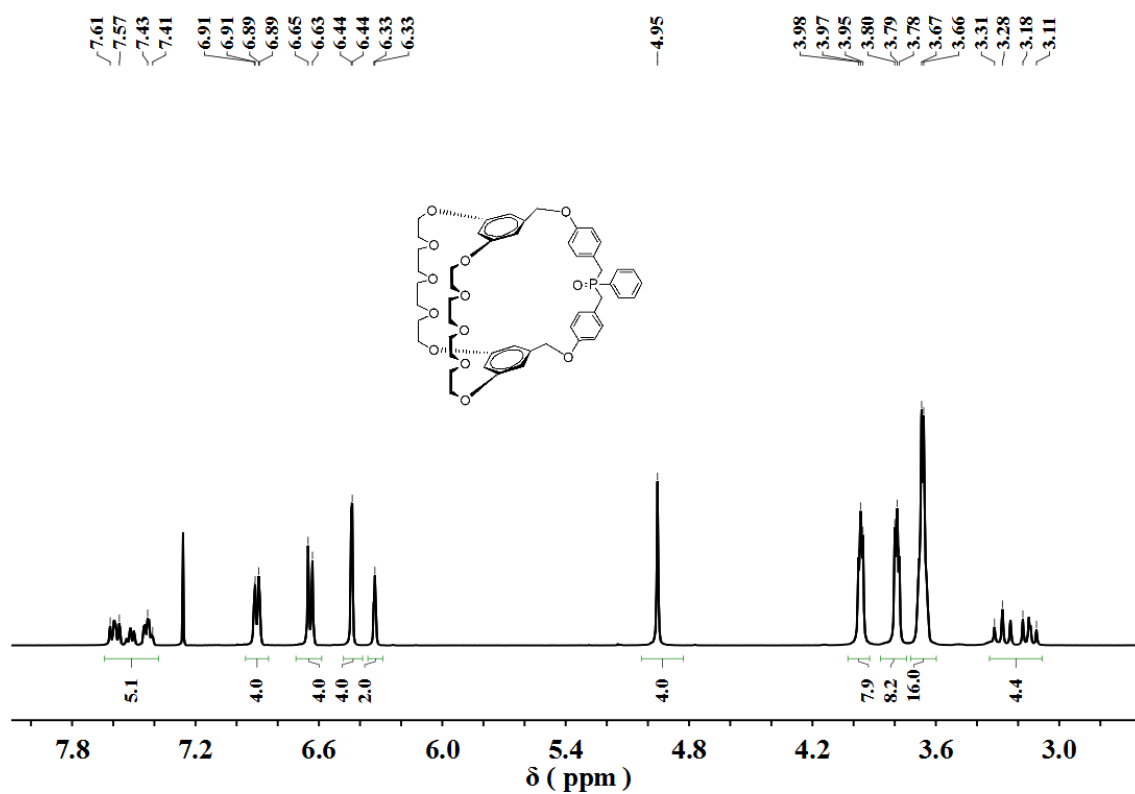

Fig. S22  $^1\text{H}$  NMR spectrum (400 MHz,  $\text{CDCl}_3$ , 298 K) of **2**.

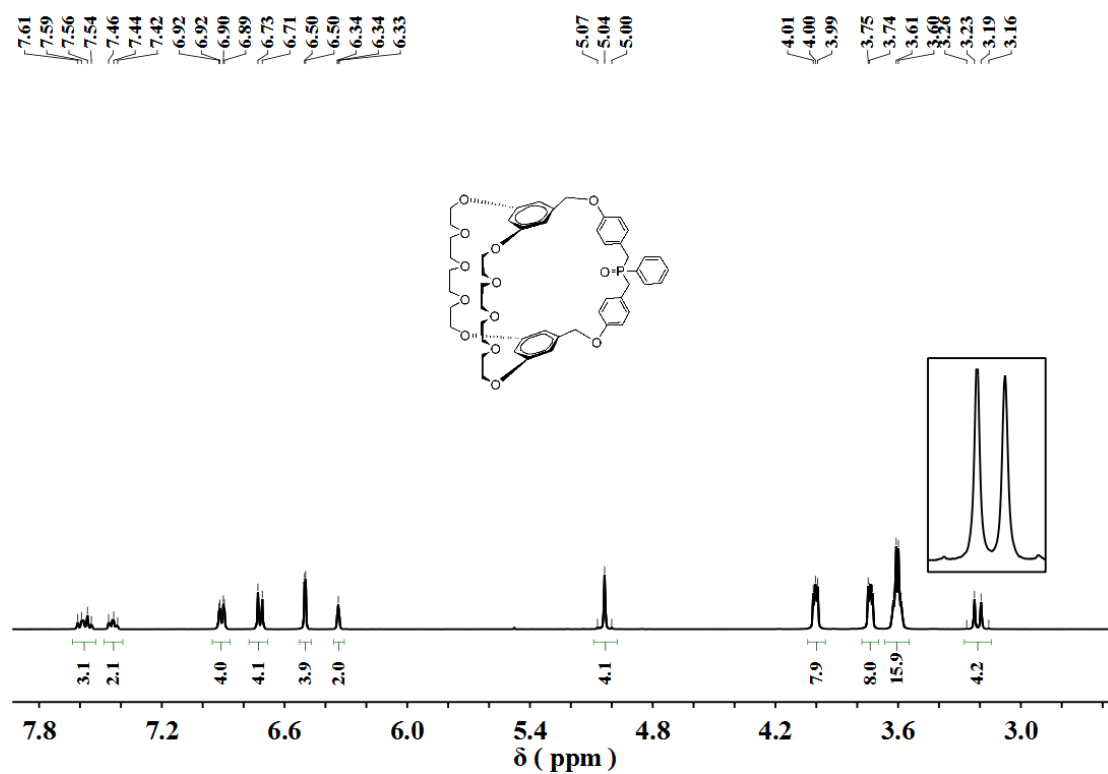

Fig. S23 <sup>1</sup>H NMR spectrum (400 MHz, CD<sub>3</sub>CN, 298 K) of **2**.

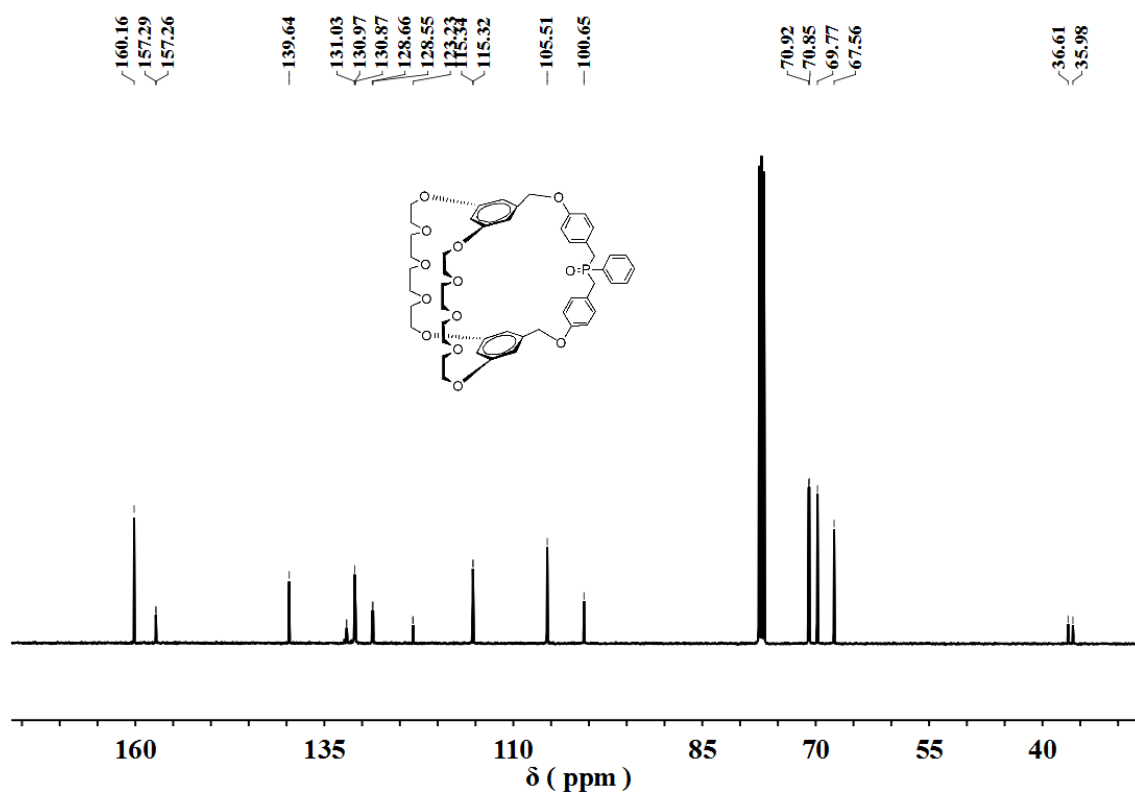

Fig. S24 <sup>13</sup>C NMR spectrum (100 MHz, CDCl<sub>3</sub>, 298 K) of **2**.

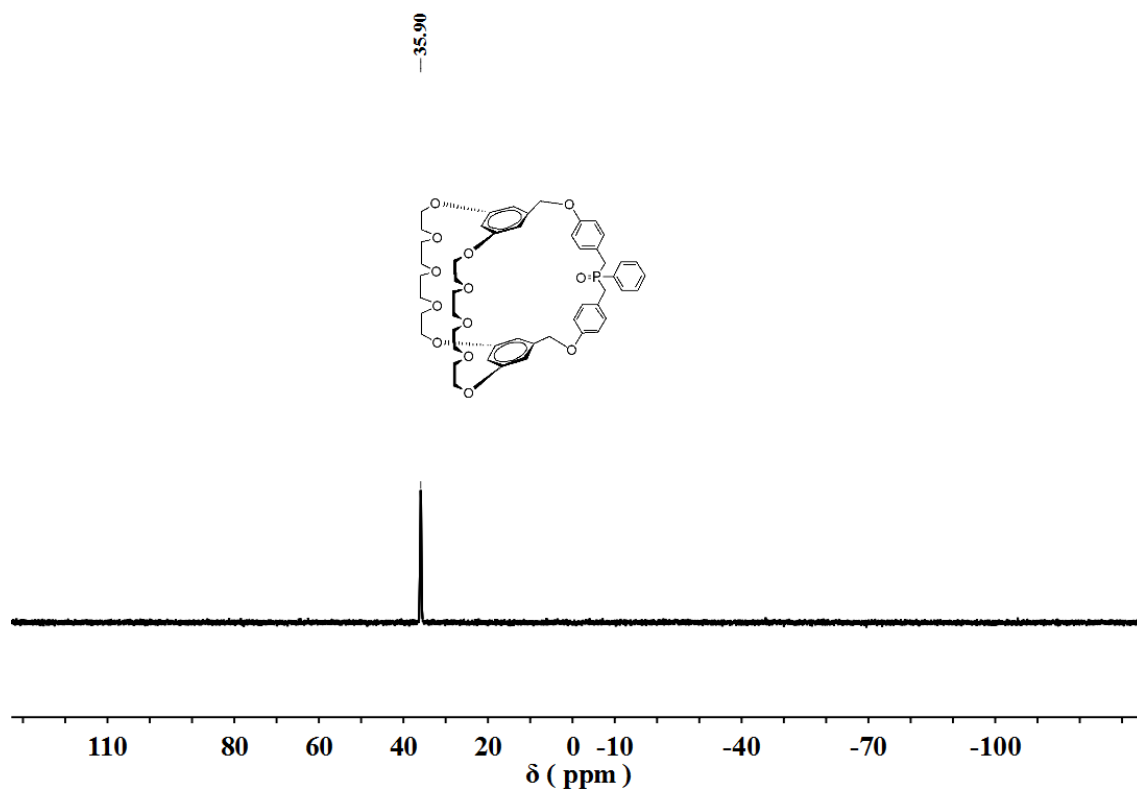

**Fig. S25**  $^{31}\text{P}$  NMR spectrum (400 MHz,  $\text{CDCl}_3$ , 298 K) of **2**.

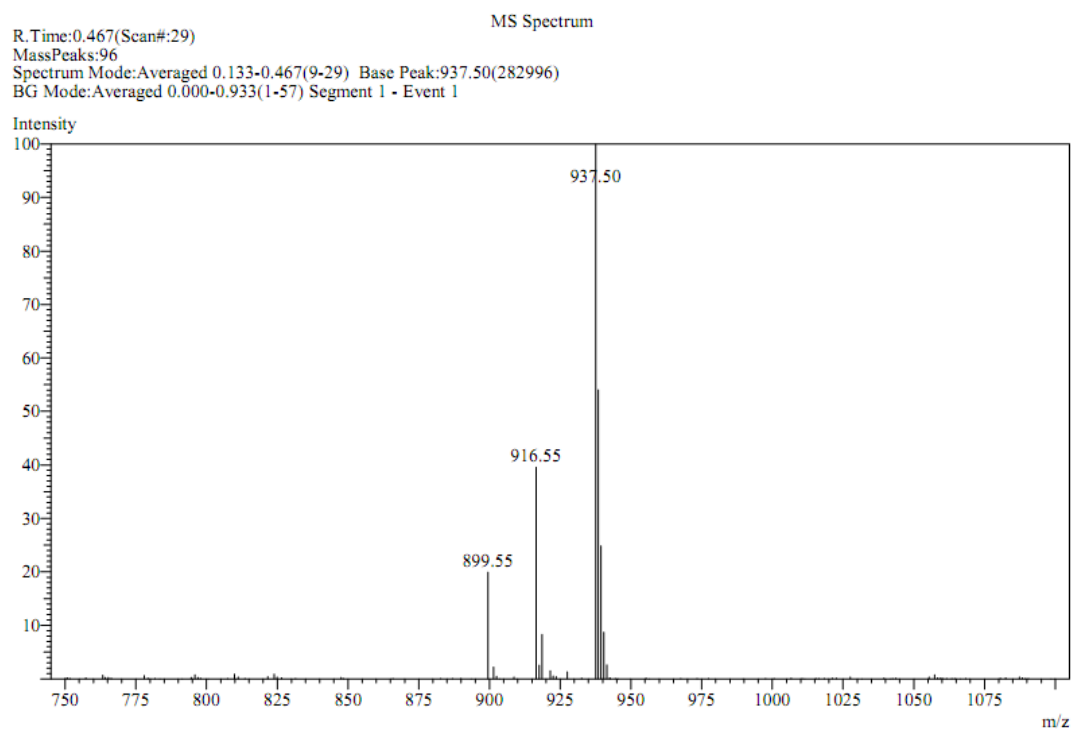

**Fig. S26** LR-ESI-MS spectrum of **2**.

### 3. Studies of charge transfer interactions by UV-vis spectra

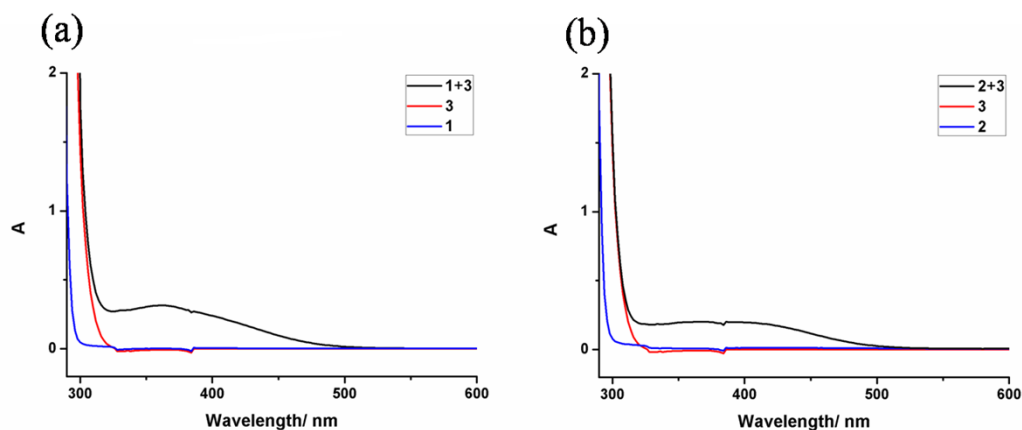

**Fig. S27** (a) UV-vis absorption spectra of **1**, **3**, and **1+3** (1:1, molar ratio), respectively in  $\text{CH}_3\text{CN}$ ; (b) UV-vis absorption spectra of **2**, **3**, and **2+3** (1:1, molar ratio), respectively in  $\text{CH}_3\text{CN}$  (the concentration for **1**, **2**, and **3** is  $8 \times 10^{-4}$  mM, respectively).

### 4. Job plots for the complexes of **1**↔**3** and **2**↔**3**

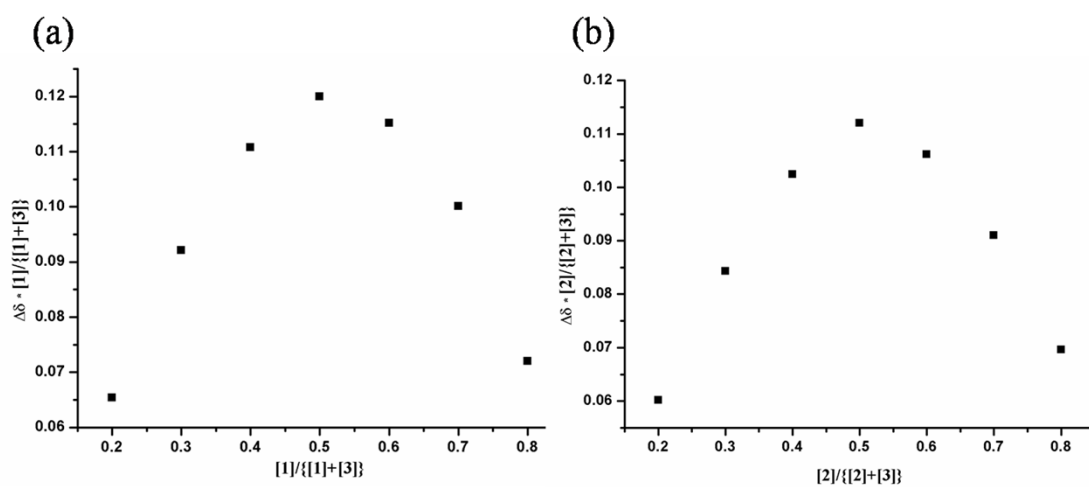

**Fig. S28** Job Plots showing the 1:1 stoichiometry of the complexation between **1** and **3** (a) and **2** and **3** (b) in  $\text{CD}_3\text{CN}$ . ( $[\text{H}] + [\text{G}] = 4$  mM).

## 5. LR-ESI-MS spectra of the complexes of **1**⇌**3** and **2**⇌**3**

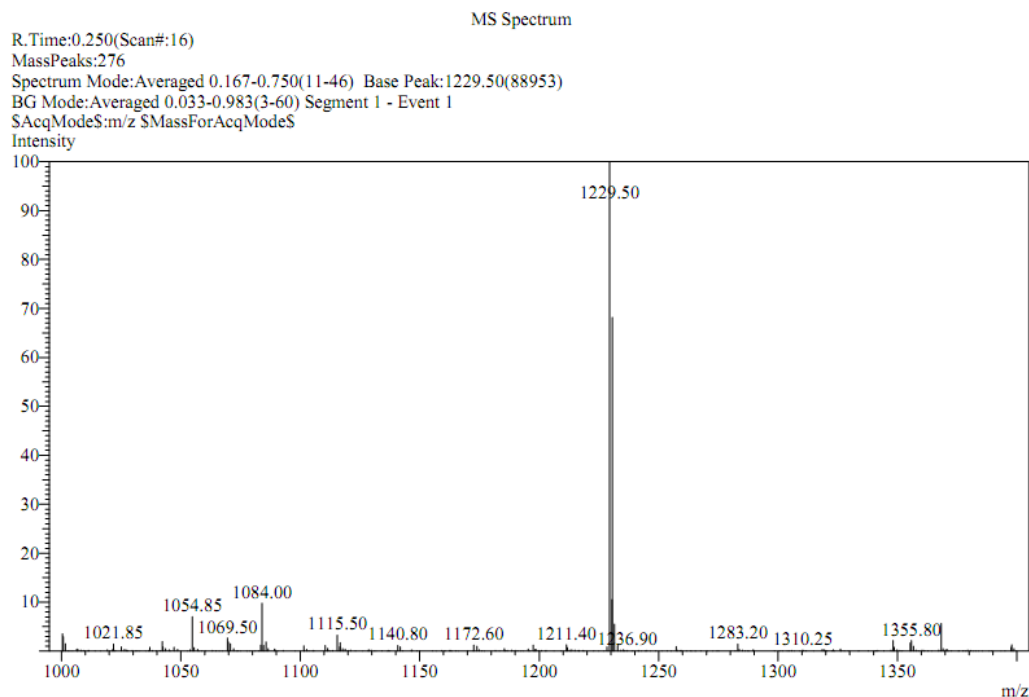

**Fig. S29** LR-ESI-MS of an equimolar mixture of **1** and **3**. Assignment of main peaks:  $m/z$  1229.50 (100%) for  $[\mathbf{1}\mathbf{\rightleftharpoons}\mathbf{3}\text{-PF}_6]^+$ . This result confirmed the 1:1 complexation stoichiometry between **1** and **3**.

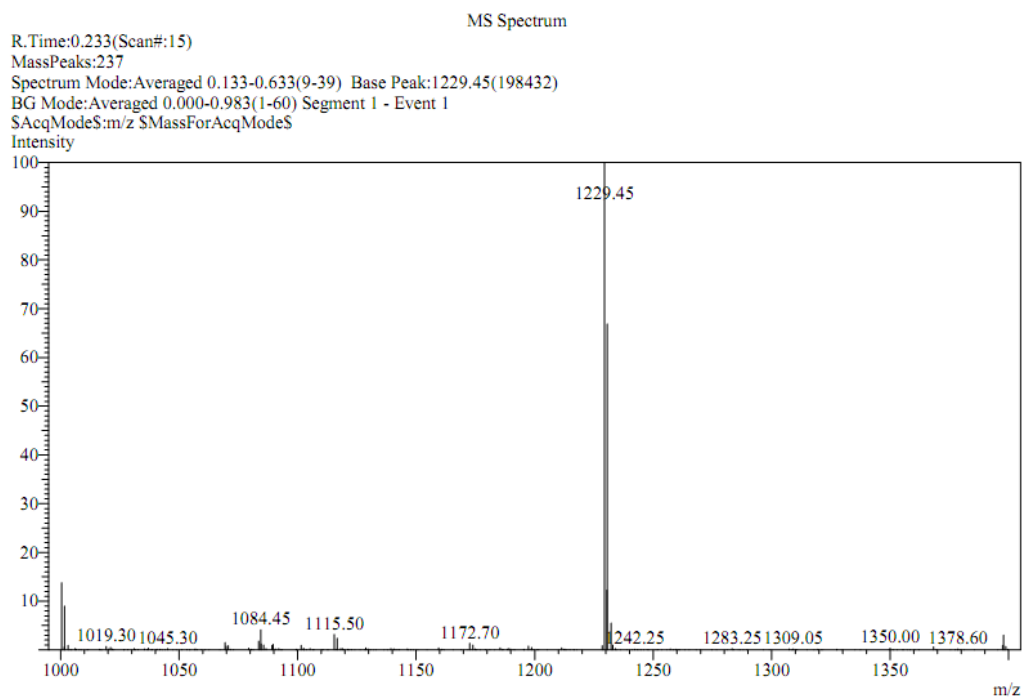

**Fig. S30** LR-ESI-MS of an equimolar mixture of **2** and **3**. Assignment of main peaks:  $m/z$  1229.45 (100%) for  $[\mathbf{2}\mathbf{\rightleftharpoons}\mathbf{3}\text{-PF}_6]^+$ . This result confirmed the 1:1 complexation stoichiometry between **2** and **3**.

## 6. Determination of the association constants of **1**↔**3** and **2**↔**3** by <sup>1</sup>H NMR

To determine the association constant between the host (**1** or **2**) and the guest **3**, <sup>1</sup>H NMR titration experiments were performed with a constant concentration of the host (2.00 mM) and varying concentrations of the guest. Using a non-linear curve-fitting method, the association constant was obtained for each host-guest combination from the following equation:<sup>S4</sup>

$$\Delta\delta = (\Delta\delta_{\infty}/[H]_0) (0.5[G]_0 + 0.5([H]_0 + 1/K_a) - (0.5 ([G]_0^2 + (2[G]_0(1/K_a - [H]_0)) + (1/K_a + [H]_0)^2)^{0.5})) \text{ (Eq. S1)}$$

Where  $\Delta\delta$  is the chemical shift change of H<sub>a</sub> on host at  $[G]_0$ ,  $\Delta\delta_{\infty}$  is the chemical shift change of H<sub>a</sub> when the host is completely complexed,  $[H]_0$  is the fixed initial concentration of the host, and  $[G]_0$  is the initial concentration of the guest.

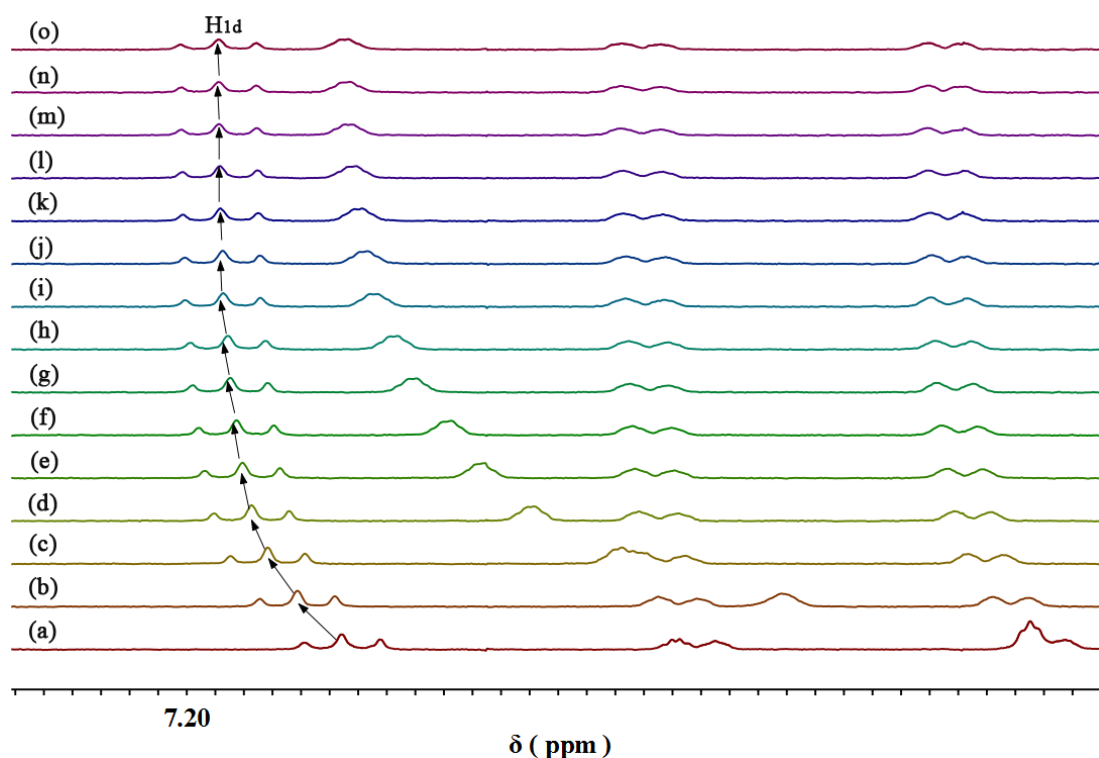

**Fig. S31** Partial <sup>1</sup>H NMR spectral changes (300 MHz, CD<sub>3</sub>CN, 298 K) of **1** at a concentration of 2.00 mM upon addition of **3**: (a) 0.00, (b) 1.00, (c) 2.00, (d) 3.00, (e) 4.00, (f) 5.00, (g) 7.00, (h) 9.00, (i) 13.00, (j) 17.00, (k) 20.00, (l) 24.00, (m) 30.00, (n) 36.00, (o) 40.00 mM.

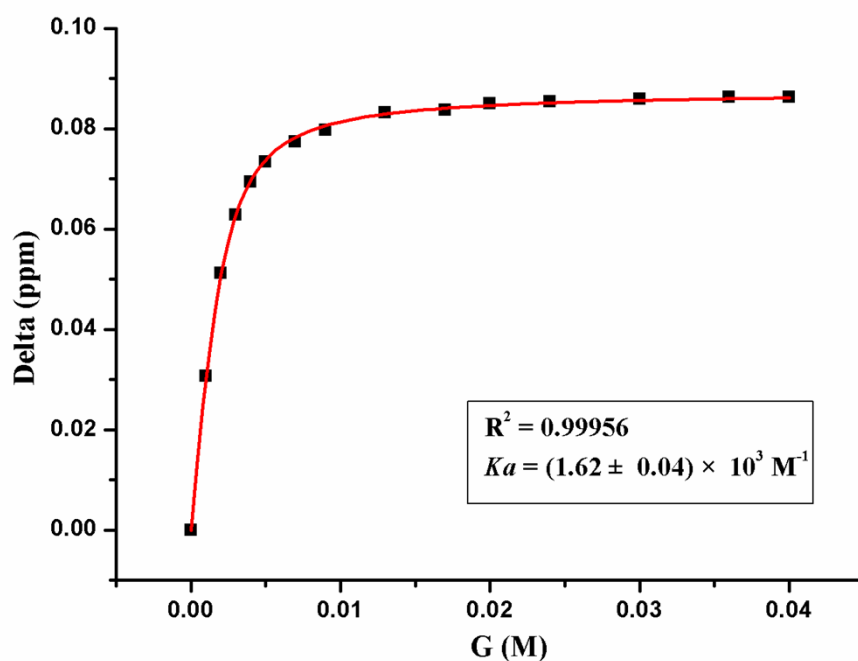

**Fig. S32** The chemical shift changes of H<sub>1d</sub> on **1** upon addition of **3**. The red solid line was obtained from the non-linear curve-fitting using Eq.S1. The association constant ( $K_a$ ) of **1**⊃**3** was estimated to be about  $(1.62 \pm 0.04) \times 10^3 \text{ M}^{-1}$ .

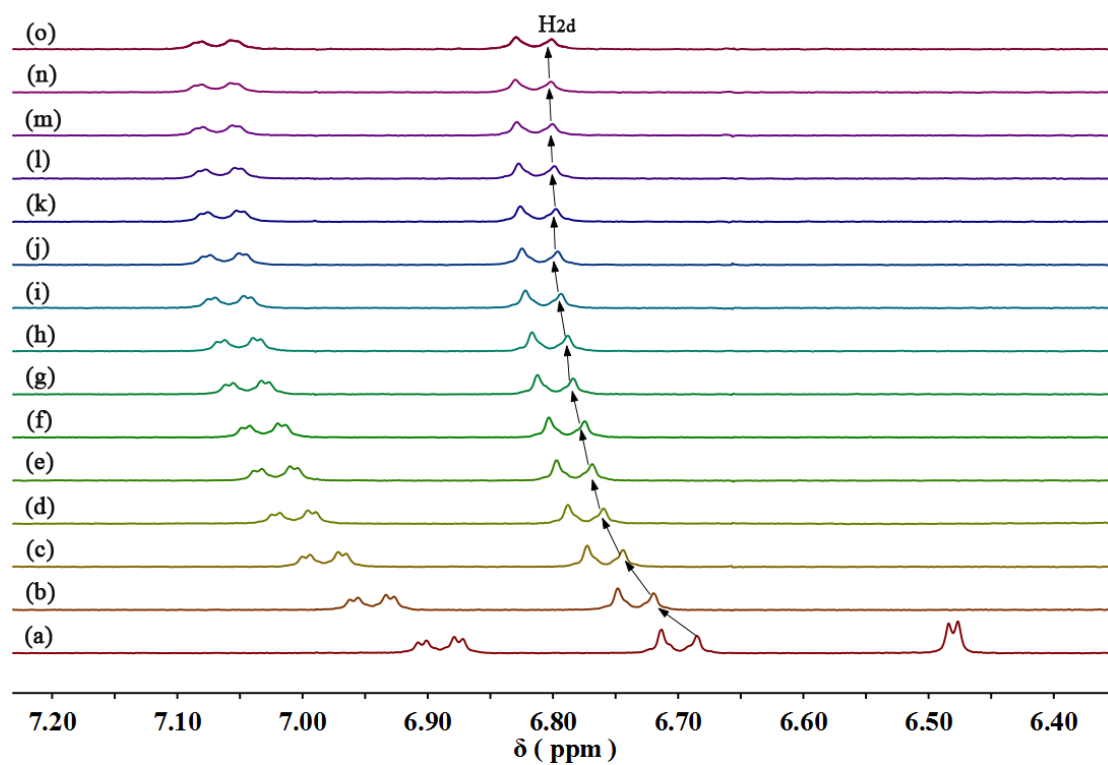

**Fig. S33** Partial  $^1\text{H}$  NMR spectral changes (300 MHz,  $\text{CD}_3\text{CN}$ , 298 K) of **2** at a concentration of 2.00 mM upon addition of **3**: (a) 0.00, (b) 1.00, (c) 2.00, (d) 3.00, (e) 4.00, (f) 5.00, (g) 7.00, (h) 9.00, (i) 13.00, (j) 17.00, (k) 20.00, (l) 24.00, (m) 30.00, (n) 36.00, (o) 40.00 mM.

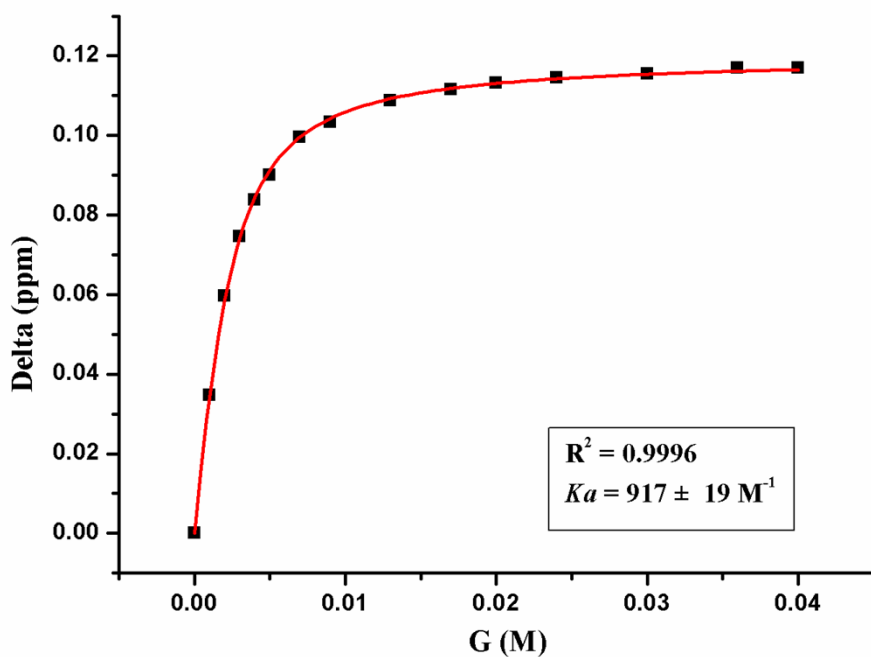

**Fig. S34** The chemical shift changes of  $H_{2d}$  on **2** upon addition of **3**. The red solid line was obtained from the non-linear curve-fitting using Eq.S1. The association constant ( $K_a$ ) of **2**⇌**3** was estimated to be about  $917 \pm 19 \text{ M}^{-1}$ .

## 7. Partial 2D COSY NMR spectra of **1** and **1**⇌**3**

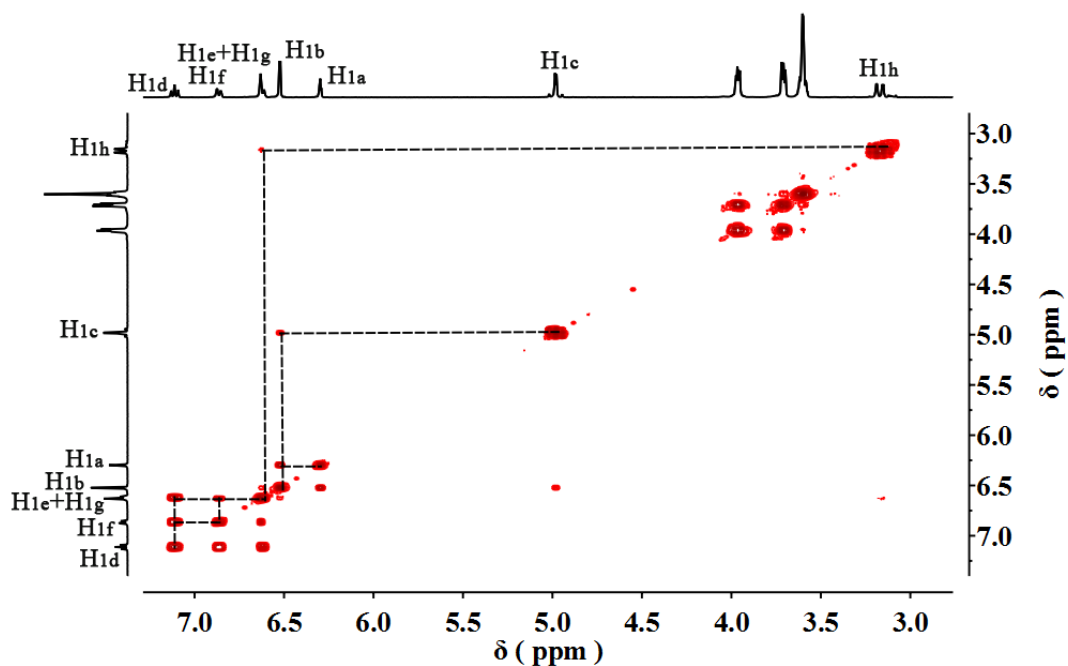

**Fig. S35** Partial COSY NMR (400 MHz,  $\text{CD}_3\text{CN}$ , 298 K) spectrum of **1** (6.00 mM).



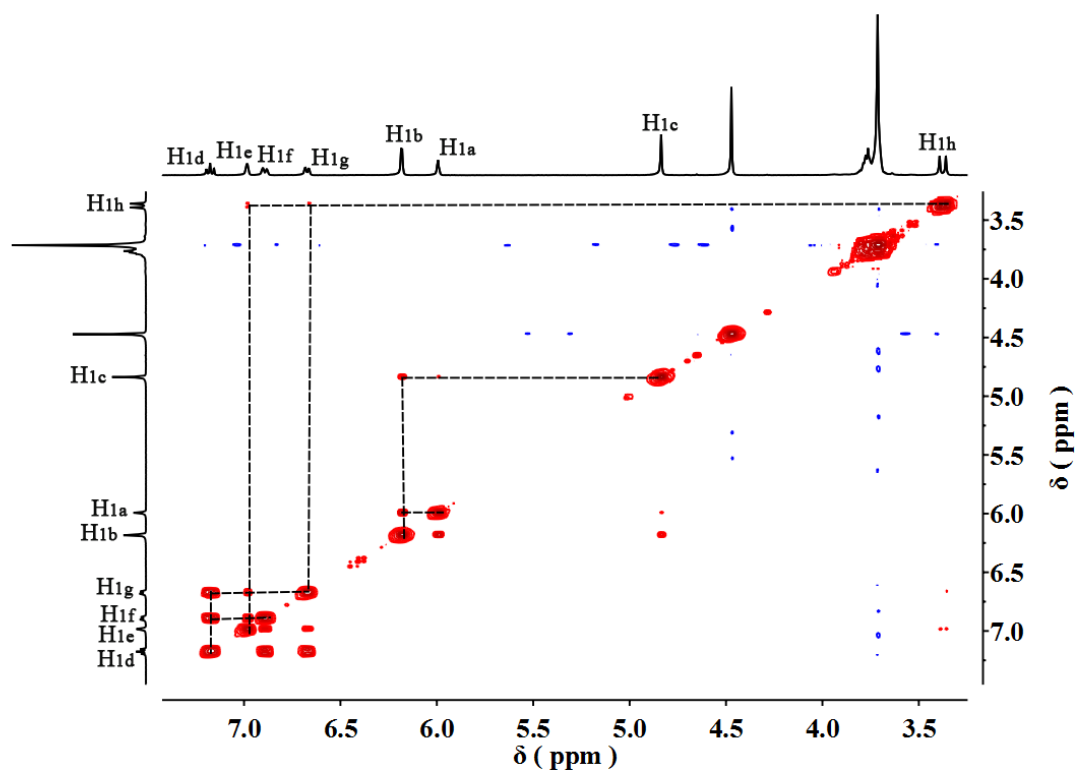

**Fig. S36** Partial COSY NMR (400 MHz, CD<sub>3</sub>CN, 298 K) spectrum of **1**↔**3** (1:1, 6.00 mM each).

8. *Partial 2D NOESY NMR spectra of 1↔3 and 2↔3*

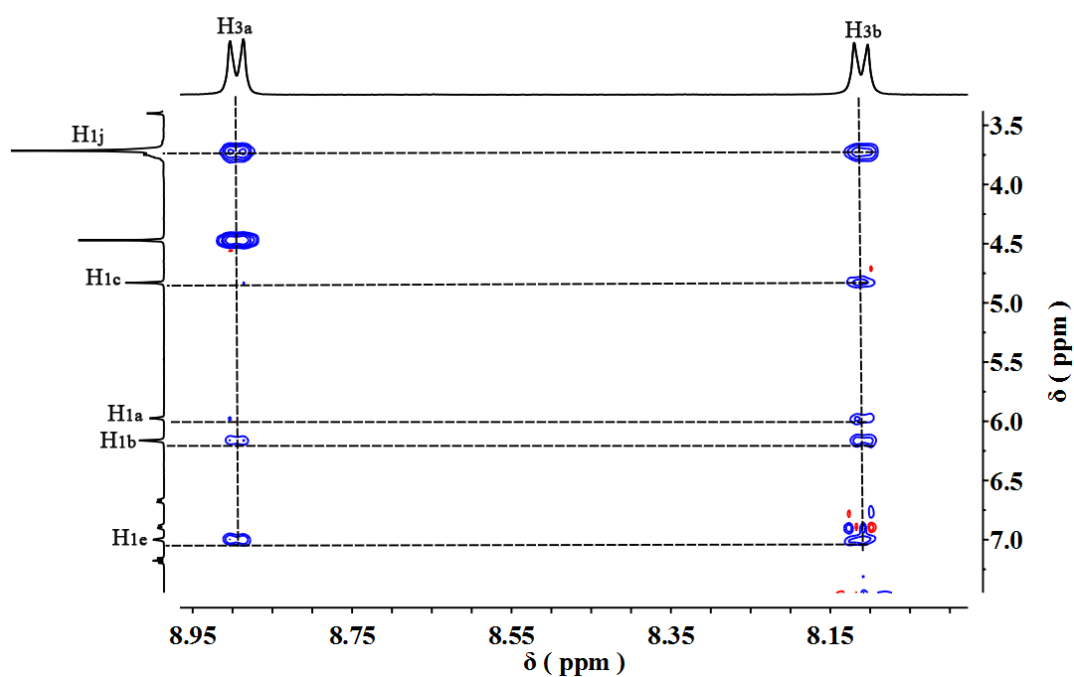

**Fig. S37** Partial NOESY NMR (400 MHz, CD<sub>3</sub>CN, 298 K) spectrum of **1**↔**3** (1:1, 6.00 mM each).

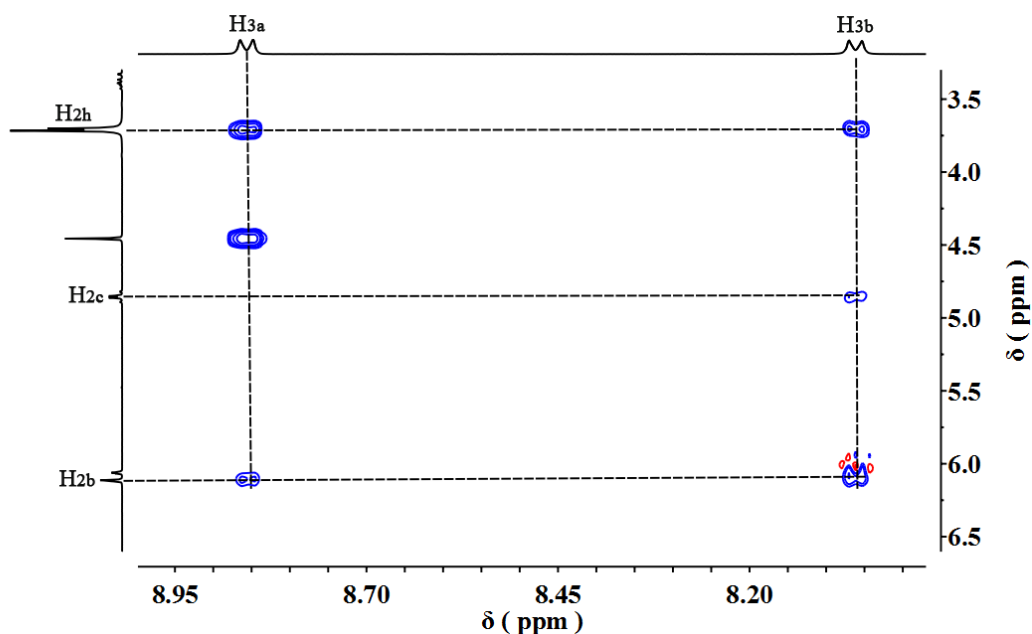

**Fig. S38** Partial NOESY NMR (400 MHz, CD<sub>3</sub>CN, 298 K) spectrum of **2⇌3** (1:1, 6.00 mM each).

## 9. X-ray crystal data of **1⇌3** and **2⇌3**

**Table 1** Crystal data and structure refinement for **1⇌3**

|                        |                                                                                               |
|------------------------|-----------------------------------------------------------------------------------------------|
| CCDC number            | 1004105                                                                                       |
| Empirical formula      | C <sub>64</sub> H <sub>80</sub> F <sub>12</sub> N <sub>3</sub> O <sub>15</sub> P <sub>3</sub> |
| Formula weight         | 1452.22                                                                                       |
| Temperature            | 173(2)                                                                                        |
| Wavelength             | 0.71073 Å                                                                                     |
| Crystal system         | monoclinic                                                                                    |
| Space group            | <i>P2(1)</i>                                                                                  |
| <i>a</i>               | 11.316(2) Å                                                                                   |
| <i>b</i>               | 24.717(2) Å                                                                                   |
| <i>c</i>               | 14.0638(11) Å                                                                                 |
| $\alpha$               | 90.00°                                                                                        |
| $\beta$                | 100.065(3)°                                                                                   |
| $\gamma$               | 90.00°                                                                                        |
| Volume                 | 3873.0(9) Å <sup>3</sup>                                                                      |
| <i>Z</i>               | 2                                                                                             |
| Density (calculated)   | 1.245                                                                                         |
| Absorption coefficient | 0.164                                                                                         |
| F(000)                 | 1516                                                                                          |
| Crystal size           | 0.28 × 0.24 × 0.22 mm <sup>3</sup>                                                            |

|                                      |                                                                    |
|--------------------------------------|--------------------------------------------------------------------|
| Theta range for data collection      | 2.21 to 20.61°                                                     |
| Index ranges                         | $-13 \leq h \leq 13$ , $-25 \leq k \leq 29$ , $-17 \leq l \leq 17$ |
| Reflections collected                | 28483                                                              |
| Independent reflections              | 13314 [R(int) = 0.0191]                                            |
| Completeness to theta = 26.00°       | 97.7 %                                                             |
| Absorption correction                | multi-scan                                                         |
| Refinement method                    | Full-matrix least-squares on $F^2$                                 |
| Goodness-of-fit on $F^2$             | 1.064                                                              |
| Final R indices [ $I > 2\sigma(I)$ ] | $R1 = 0.0540$ , $wR2 = 0.1368$                                     |
| R indices (all data)                 | $R1 = 0.0551$ , $wR2 = 0.1372$                                     |
| Largest diff. peak and hole          | 0.327 and $-0.289 \text{ e} \cdot \text{\AA}^{-3}$                 |

**Table 2** Crystal data and structure refinement for **2**→**3**

|                                      |                                                                            |
|--------------------------------------|----------------------------------------------------------------------------|
| CCDC number                          | 1011981                                                                    |
| Empirical formula                    | $\text{C}_{62}\text{H}_{73}\text{F}_{12}\text{N}_3\text{O}_{13}\text{P}_3$ |
| Formula weight                       | 1375.13                                                                    |
| Temperature                          | 296(2)                                                                     |
| Wavelength                           | 1.54178 Å                                                                  |
| Crystal system                       | monoclinic                                                                 |
| Space group                          | $P2(1)/n$                                                                  |
| $a$                                  | 17.2062(4) Å                                                               |
| $b$                                  | 23.6008(5) Å                                                               |
| $c$                                  | 18.4826(4) Å                                                               |
| $\alpha$                             | 90.00°                                                                     |
| $\beta$                              | 90.615(2)°                                                                 |
| $\gamma$                             | 90.00°                                                                     |
| Volume                               | 7505.0(3) Å <sup>3</sup>                                                   |
| Z                                    | 4                                                                          |
| Density (calculated)                 | 1.217                                                                      |
| Absorption coefficient               | 1.468                                                                      |
| F(000)                               | 2864                                                                       |
| Crystal size                         | $0.28 \times 0.26 \times 0.22 \text{ mm}^3$                                |
| Theta range for data collection      | 4.45 to 51.08°                                                             |
| Index ranges                         | $-19 \leq h \leq 19$ , $-26 \leq k \leq 27$ , $-21 \leq l \leq 21$         |
| Reflections collected                | 37065                                                                      |
| Independent reflections              | 11403 [R(int) = 0.0437]                                                    |
| Completeness to theta = 63.00°       | 94.0 %                                                                     |
| Absorption correction                | multi-scan                                                                 |
| Refinement method                    | Full-matrix least-squares on $F^2$                                         |
| Goodness-of-fit on $F^2$             | 1.154                                                                      |
| Final R indices [ $I > 2\sigma(I)$ ] | $R1 = 0.1127$ , $wR2 = 0.2147$                                             |
| R indices (all data)                 | $R1 = 0.1662$ , $wR2 = 0.2295$                                             |
| Largest diff. peak and hole          | 0.448 and $-0.439 \text{ e} \cdot \text{\AA}^{-3}$                         |

## 10. Crystal structures of **1**→**3** and **2**→**3**

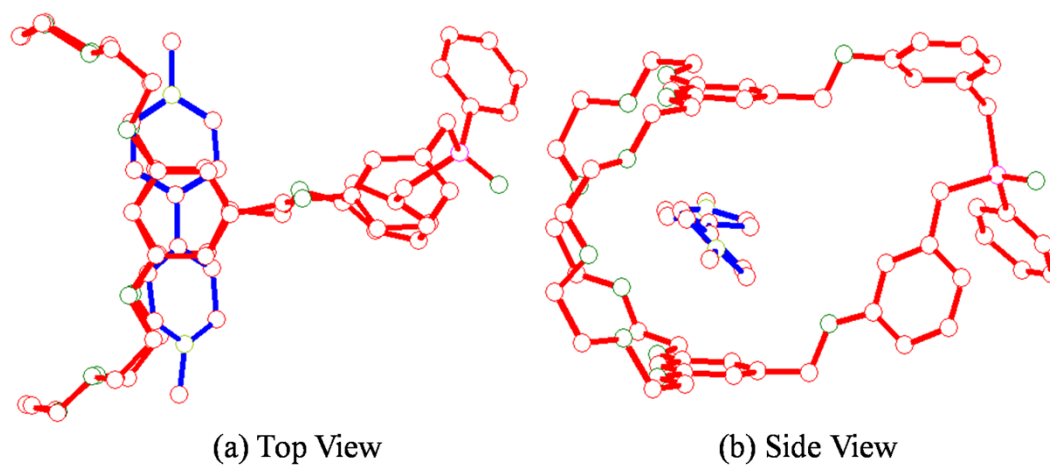

**Fig. S39** Crystal structure of **1**→**3** from the top (a) and side view (b). Hydrogen atoms and  $\text{PF}_6^-$  are omitted for clarity.

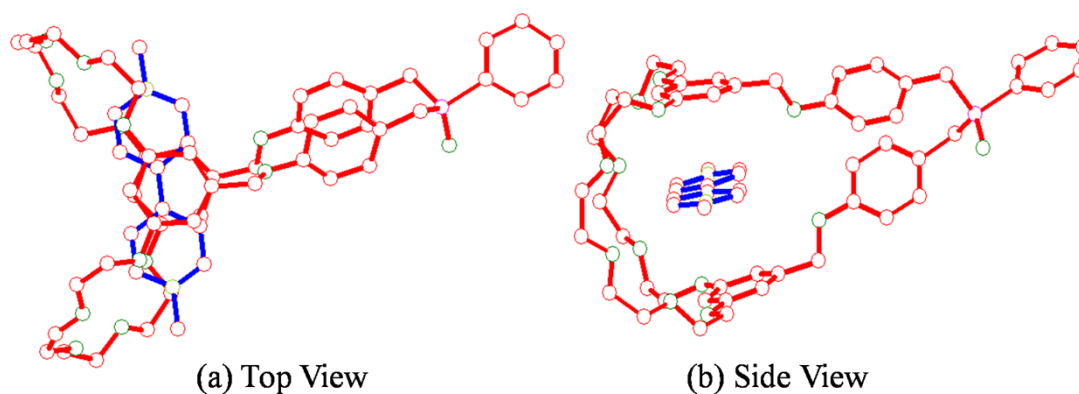

**Fig. S40** Crystal structure of **2**→**3** from the top (a) and side view (b). Hydrogen atoms and  $\text{PF}_6^-$  are omitted for clarity.

## References

- S1. J. W. Jones, L. N. Zakharov, A. L. Rheingold and H. W. Gibson, *J. Am. Chem. Soc.*, 2002, **124**, 13378.
- S2. C. Liu, J. K. Schilling, R. Ravindra, S. Bane and D. G. I. Kingston, *Bioorg. Med. Chem.*, 2004, **12**, 6147.
- S3. J. Lee, J.-H. Lee, S. Y. Kim, N. A. Perry, N. E. Lewin, J. A. Ayres and P. M. Blumberg, *Bioorg. Med. Chem.*, 2006, **14**, 2022.
- S4. P. R. Ashton, R. Ballardini, V. Balzani, M. Bělohradský, M. T. Gandolfi, D. Philp, L. Prodi, F. M. Raymo, M. V. Reddington, N. Spencer, J. F. Stoddart, M. Venturi and D. J. Williams, *J. Am. Chem. Soc.*, 1996, **118**, 4931.
